# Supplementary material for: Association mapping for total polyphenol content, total flavonoid content and antioxidant activity in barley
Source: PubMed Central journal article supplement (PMC5784657; doi:10.1186/s12864-018-4483-6), 2018-01-25
Supplement: 12864_2018_4483_MOESM11_ESM.pdf [file 12864_2018_4483_MOESM11_ESM.pdf]

**Figure S6**

>HvUGT (HORVU1Hr1G020560)

MDVGFSTAGPLRIVICPWLAFGHLLPYLELAERLASRGHRVAFVSTPRNLARL  
PPPASPCSVDLVALQLPRVDGLPEGAESTNDVPDEKRELHWKAFDGLAAPFAD  
FLAAACADDGRRPHWIIADCFHHWAAAAALDHKVPCAVLLPTAAMLAAAPR  
QQPLGSKPVEAAAAASVLGQAAAAVRLAVPRYERDDVAPAYADDCASGMSIA  
QRWFLAKERCTVLAIRSCVEWEPETFPLVETLLGKPVVPLGLLPPSADGGRRR  
AAGSSEDHVTLRWLEEQPPDSVVYIALGSEVPLSIEQVHELALGLELAGTRFL  
WALRKPAGAVVGNDDDTLPPGFRDRTRGHGLVTMGWVPQISILAHAAVGA  
FLTHCGRNSLIEGLLFGHPLVMLPIFGDQGPNARQMEAKKVGLQVARDDDDG  
SFDRHGVA AVRAVMVDGEARRGFVANALKMQAIVADKERHERYIDGFVQQ  
LRSYLQATDDLTATPNSS\*

>AT5G49690

MVDKREEVMHVAMFPWLAMGHLLPFLRLSKLLAQKGHKISFISTPRNIERLP  
KLQSNLASSITFVSFPLPPISGLPPSSESSMDVPYNKQQLKAAFDLLQPPLKEF  
LRRSSPDWIIYDYASHWLPSIAAELGISKAFFSLFNAATLCFMGPSSSLIEIRST  
PEDFTVPPWVPFKSNIVFRYHEVTRYVEKTEEDVTGVSDSVRFGYSIDESDA  
VFVRSCPEFEPEWFGLLKDLYRKPVPFPIGFLPPVIEDDDAVDTTWVRIKKWLD  
KQRLNSVYVSLGTEASLRHEEVELALGLEKSETPFFWVLRNEPKIPDGFKT  
RVKGRGMVHVGVVPQVKILSHESVGGFLTHCGWNSVVEGLGFGKVIFFPVL  
NEQGLNTRLLHGKGLGVEVSRDERDGSFDSVADSIRLVMIDDAGEEIRAKA  
KVMKDLFGNMDENIRYVDELVRFMRSKGSSSSS\*

>AT2G22590

MTNFKDNDGDGTKLHVVMFPWLAFGHMVPYLELSKLIQKGHKVSFISTPR  
NIDRLLPRLPENLSSVINFKLSLPVGDNKLPEDEATTDVPFELIPYLKIAYDG  
LKVPVTEFLESSKPDWVLQDFAGFWLPPISRRLGIKTGFFSAFNGATLGILKPP  
GFEEYRTSPADFMKPPKWVPFETSVAFKLFECRFIFKGFMAETTEGNVPDIHRV  
GGVIDGCDVIFVRSCYEYEAEWLGLTQELHRKPVIPVGVLPKPKDEKFEDTDT  
WLSVKKWLD SRKSKSIVYVAFGSEAKPSQTELNEIALGLELSGLPFFWVLKTR  
RGPWDTEPVELPEGFEERTADRGMVWRGWVEQLRTLSDSIGLVLTHPGWG  
TIIAIRFAKPMAMLVFVYDQGLNARVIEEKKIGYMIPRDETEGFFTKESVANS  
LRLVMVEEEGKVYRENVKEMKGVFGMDRQDRYVDSFLEYLVTNR\*

>AT5G65550

MAEPKPKLHVAVFPWLALGHMIPYLQLSKLIARKGHTVSFISTARNISRLPNISS  
DLSVNFVSLPLSQTVDHLPENAEATTDVPETHIAYLKKAFDGLSEAFTEFLEAS  
KPNWIVYDILHHWVPPIAEKLGVRRRAIFCTFNAASIIIIGGPASVMIQGHDPKRT  
AEDLIVPPPWVPFETNIVYRLF EAKRIMEYPTAGVTGVELNDNCRLGLAYVGS  
EVIVIRSCMELEPEWIQLLSKLQGKPVIPIGLLPATPMDDADDEGTWLDIREWL  
DRHQAKSVVYVALGTEVTISNEEIQGLAHGLELCRLPFFWTLRKRTRASMLLP  
DGFKERVKERGVWTEWVPQTKILSHGSGVGGFVTHCGWGS AVEGLSFGVPLI  
MFPCNLDQPLVARLLSGMNIGLEIPRNERDGLFTSASVAETIRHVVEEEGKIY  
RNNAASQQKKIFGNKRLQDQYADGFIEFLENPIAGV\*

>AT5G26310

MHITKPHAAMFSSPGMGHVLPVIELAKRLSANHGFHVTVFVLETDAASVQSK  
LLNSTGVDIVNLPSPDISGLVDPNAHVVTKIGVIMREAVPTLRSKIVAMHQNP  
ALIIDLFGTDALCLAAELNMLTYVFIASNARYLGVSIYYPTLDEVIKKEHTVQR  
KPLTIPGCEPVR FEDIMDAYLVPDEPVYHDLVRHCLAYPKADGILVNTWEEME  
PKSLKSLQDPKLLGRVARVPVYPVGPLCRPIQSSTTDHPVFDWLNKQPNE  
SVLYISFGSGGSLTAQQLTELAWGLEESQQRFIWVVRPPVDGSSCS  
DYFSAKGGVT KDNTPEYLPEGFVTRTCDRGMIPSWAPQAEILAHQAVGG  
FLTHCGWSSTLES VLCGVPMIAWPLFAEQNMNAALLSDELGISVRVDD  
PKEAISRSKIEAMVRKV MAEDEGEEMRRKVKKLRDTAEMSLSIHGGG  
SAHESLCRVTKECQRFLECVG DLGRGA\*

>AT2G18570

MDQPHALLVASPGLGHLPILELGNRLSSVLNIHV  
TILAVTSGSSSPTETEAIHA AAARTICQITEIPSVDV  
DNLVEPDATIFTKMVVKMRAMKPAVRDAVKLMK  
RKPVTVMIVDFLGT  
ELMSVADDVGM  
TAKYVYVPTHAWFLAVM  
VYLPVLDTVVEG EYVDIKEPLKIPGCKPVGPKELMETMLDRSGQYKECVRAGLEVPMSDGV  
LVNTWEELQGN  
TLAALREDEELSRVMKVPVYPIGPIVRTNQHV  
DKPNSIFEWLDE QRERSVVFVCLGSGGTLT  
FEQTVELALGLELSGQRFVWVLR  
RPASYLGAISSD DEQVSASLPEGFLDRTRGV  
GIVVTQWAPQVEILSHRSIGGFLSHCGWSSALE  
SLTKGVPIIAWPLYAEQWMNATLLTEEIGVAVRT  
SELPSERVIGREEVASLVRKIMAEDEEGQKIRA  
KAEVVRVSSERAWSKDGSSYNLSFEWAKRCYL  
VP\*

>AT2G18560

MREMKSTVRDAVKSMKQKPTVMIVDFFGTALLSITDVGVT  
SKYVYIPSHAWF LALIVYLPVLDKVM  
EGEYVDIKEPMKIPGCKPVGPKELLD  
TMLDRSDQQYRD CVQIGLEIPMSDGV  
LVNTWGELQGKTLAALREDIDLNRVIKVPVYPIGPI  
VRTN VLIKPNSTFEWLDKQEERSVYVCLGSGG  
TLSFEQTMELAWGLELSCQSFL WVLRKPPSYL  
GASSKDDDQVSDGLPEGFLDRTRGVGLVVTQWAPQ  
VEILSHRSIGGFLSHCGWSSVLES  
LTKGVPIIAWPLYAEQWMNATLLTEEIGMAIR  
TSELPS KKVISREEVASLVKKIVAEEDKEGRKIK  
TKAEVVRVSSERAWTHGGSSHSSLFE WAKRCGL  
VS\*

>AT4G36770

MELHGALVASPGMGHAVPILELGKHLNHHGFDRVT  
VFLVTDDVSRKSLIGK TLMEEDPKFVIRFIPLD  
VSGQDLGSLTKLAEMMRKALPEIKSSVMELEPR  
PRVFVVDLLGTEALEVAKELGIMRKHVLT  
TSAWFLAFTVYMASLDKQELYKQL SSIGALLIP  
GCSPVKFERAQDPRKYIRELAESQRIGDEVITAD  
GVFVNTWHSLE QVTIGSFLDPENLGRVMRGV  
PVYPVGPLVRPAEPGLKHGVLDWLDLQPKESV  
VYVSFGSGGALTFEQTNELAYGLELTGHRFVWV  
VRPPAEDDPSASMFDKTKNETEPLDFL  
PNGFLDRTKDIGLVVRTWAPQEEILAHKSTGGFV  
THCGWNSVLESI VNGVPMVAWPLYSEQM  
NARMVSGELKIALQINVADGIVKKEVIAEMV  
KRMDEEEGKEMRKNVKELKKTAEEALNMTHIP  
SAYFT\*

>AT4G01070

MEESKTPHVAIIPSPGMGHILPLVEFAKRLVHLHGLT  
VTFVIAGEGPPSKAQR  
TVLDSLPSISSVFLPPVDLTDLSSSTRIESRISLTV  
TRSNPEL  
RKVFDSFVEGGRLPT ALVVDLFGTDAFDVA  
VEFHVPPYIFYPTTANVLSFFLHLPKLD  
ETVSCEFRELTEPLMLPGCVPVAGKDFLDPAQDR  
KDDAYKWLHNTKRYKEAEGILVNTFFEL

EPNAIKALQEPGLDKPPVYPVGPLVNIGKQEAQTEESECLKWLDNQLGSLV  
YVSFGSGGTLTCEQLNELALGLADSEQRFLWVIRSPSGIANSYFDSHSQTDPL  
TFLPPGFLERTKKRGFVIPFWAPQAQVLAHPSTGGFLTHCGWNSTLESVVS  
GIP  
LIAWPLYAEQKMNAVLLSEDIRAALRPRAGDDGLVRREEVARVVKGLMEGEE  
GKGVNRNKMKEKAEACRVLKDDGTSTKALSVALKWKAHKKELEQNGNH\*  
>AT5G66690

MHITKPHAAMFSSPGMGHVIPVIELGKRLSANNGFHVTVFVLETDAASAQSK  
FLNSTGVDIVKLPSPDIYGLVDPDDHVVTKIGVIMRAAVPALRSKIAAMHQKP  
TALIVDLFGTDALCLAKEFNMLS YVFIPTNARFLGVSIIYYPNLDKDIKEEHTVQ  
RNPLAIPGCEPVRFEDTLDAYLVPDEPVYRDFVRHGLAYPKADGILVNTWEEM  
EPKSLKSLLNPKLLGRVARVPVYPIGPLCRPIQSSETDHPVLDWLNEQPNE  
SVL  
YISFGSGGCLSAKQLTELAWGLEQSQRQFVWVVRPPVDGSCCSEYVSANGG  
TEDNTPEYLPEGFVSRTSDRGFVPSWAPQAEILSHRAVGGFLTHCGWSSTLES  
VVGGVPMIAWPLFAEQNMNAALLSDELGIAVRLDDPKEDISRWKIEALVRKV  
MTEKEGEAMRRKVKKLRDSAEMSLSIDGGGLAHESLCRVTKECQRFLERVV  
DLSRGA\*  
>AT4G34138

MGTPVEVSKLHFLFPFMAHGHMIPITLDMAKLFATKGAKSTILTTPLNKLF  
FEKPIKSFNQDNPGLEDITIQILNFPCTELGLPDGCENTDFIFSTPDLNVGDLSQK  
FLLAMKYFEEPLEELLVTMRPDCLVGNMFFPWSTKVAEKFGVPRLVFHGTGY  
FSLCASHCIRLPKNVATSSEPFVIPDLPGDILITEEQVMETEEESVMGRFMKAIR  
DSERDSFGVLVNSFYELEQAYSDFKSFVAKRAWHIGPLSLGNRKFEEKAERG  
KKASIDEHECLKWLDSSKCDSVIYMAFGTMSSEFKNEQLIEIAAGLDMMSGHDF  
VWVVRNRKGSQVEKEDWLPEGFEEKTKGKGLIIRGWAPQVLILEHKAIGGFLT  
HCGWNSLLEGVAAGLPMVTWPVGAEQFYNEKLVTVLKTGVS VGVKKMM  
QVVGDFISREKVEGAVREVMVGEERRKRAKELAEAMAKNAVKEGGSSDLEVD  
RLMEELTLVKLQKEKV\*

>AT3G50740  
MKITKPHVAMFASPGMGHIIPVIELGKRLAGSHGFDVTIFVLETDAASAQSQFL  
NSPGCDAALVDIVGLPTPDISGLVDPSAFFGIKLLVMMRETIPTIRSKIEEMQHK  
PTALIVDLFGLDAIPLGGEFNMLTYIFIASNARFLAVALFFPTLDKDMEEHIIK  
KQPMVMVPGCEPVRFEDTLETFLDPNSQLYREFVPFGSVFPTCDGIIVNTWDDM  
EPKTLKSLQDPKLLGRIAGVPVYPIGPLSRPVDPSKTNHPVLDWLNKQPDES  
V  
LYISFGSGGSLSAKQLTELAWGLEMSQQRQFVWVVRPPVDGSACSAYLSANS  
G  
KIRDGTPDYLPEGFVSRATHERGFMVSSWAPQAEILAHQAVGGFLTHCGWNSIL  
ESVVGGVPMIAWPLFAEQMMNATLLNEELGVAVRSKKLPSEG VITRAEIEALV  
RKIMVEEEGAEMRKKIKKLETAAESLSCDGGVAHESLSRIADESEHLLERV  
CMARGA\*

>AT4G34131  
MSSDPHRKLVVFFPFMAYGHMIPITLDMAKLFSSRGAKSTILTTPLNKIFQKP  
IERFKNLNPSFEIDIQIFDFPCVDLGLPEGCENVDFFTSNNNDQRQYLTKFFKS  
TRFFKDQLEKLETTTRPDCLIADMFFPWATEAAEKFNVPRLVFHGTGYFSLCS  
EYCIRVHNPQNIVASRYEPFVIPDLPGNIVITQEIQIADRDEESEMGKFMIEVKES  
DVKSSGVIVNSFYELEPDYADFYKSVVLKRAWHIGPLSVYNRGFEEKAERGGK

KASINEVECLKWLDSKKPDSVIYISFGSVACFKNEQLFEIAAGLETSGANFIWV  
VRKNIGIEKEEWLPEGFEERVKGKGMIRGWAPQVLILDHQATCGFVTHCGW  
NSLLEGVAAGLPMVTWPVAAEQFYNEKLVTVLRTGVSVGAKKNVRTTGDFI  
SREKVVKAVREVLVGEADERRERAKKLAEMAKAAVEGGSSFNDLNSFIEEF  
TS\*

>AT1G01420

MADGNTPHVAIIPSPGIGHLIPLVELAKRLLDNHGFTVTFIIPGDSPPSKAQRSV  
LNSLPSSIASVFLPPADLSDVPSTARIETRISLTVTRSNPALRELFGLSLSAEKRLPA  
VLVVDLFGTDAFDVAAEFHVSPYIFYASNANVLTFLLHLPKLDVTSCEFREL  
EPVPIPGCVPIITGKDFVDPCQDRKDESYKWLHNVKRFKEAEGILVNSFVDLEP  
NTIKIVQEPAPDKPPVYLIGPLVNSGSHDADVNDYKCLNWLDNQPFQSVLYV  
SFGSGGTLTFEQFIELALGLAESGKRFLWVIRSPSGIASSSYFNPQSRNDPFSFLP  
QGFLDRTKEKGLVVGSWAPQAQILHTSIGGFLTHCGWNSLESIVNGVPLIA  
WPLYAEQKMNALLVDVGAALRLRAGEDGVVGREEVARVVKGLIEGEEGNA  
VRKKMKELKEGSVRVLRDDGFSTKSLNEVSLKWKAAHQKIDQEQESFL\*

>AT4G27570

MGGLKFHVLMYPWFATGHMTPFLFLANKLAEKGHTVTFLLPKKSLKQLEHF  
NLFPHNIVFRSVTVPHVDGLPVGTTETASEIPVTSTDLLMSAMDLTRDQVEAVV  
RAVEPDLIFFDFAHWIPEVARDFGLKTVKYVVVSASTIASMLVPGGELGVPPPG  
YPSSKVLLRKQDAYTMKKLEPTNTIDVGNLLERVTTSLMNSDVIAIRTAREIE  
GNFCDYIEKHCRKKVLLTGPFVPEPDKTRELEERWVKWLSGYEPDSVVFAL  
GSQVILEKDQFQELCLGMELTGPFLVAVKPPRGSSTIQEALPEGFEERVKGRG  
LVWGGWVQQPLILSHPSVGCFFVSHCGFGSMWESLLSDCQIVLVPQLGDQVLN  
TRLSDDELKVSVEVAREETGWFSKESLCDAVNSVMKRDELGNLVRKNHTK  
WRETVASPLMTGYVDAFVESLQDLVSGTTHD\*

>AT2G29740

MAKQQAELIFIPPIPGHILATIELAKRLISHQPSRIHTITILHWSLPFLPQSDTIA  
FLKSLIETESRIRLITLPDVQNPMMELFVKASESYILEYVKKMVPLVRNALSTL  
LSSRDES SVHVAGLVLDFFCVPLIDVGNENLPSYIFLTCSASFLGMMKYLL  
RNRETKPELNRSSDEETISVPGFVNSVPVKVLPGLFTTESYEAWVEMAERFPE  
AKGILVNSFESLERNAFDYFDRRPDNYPPVYPIGPILCSNDRPNLDSLDRILK  
WLDDQPESSVFLCFGSLKSLAASQIKEIAQALELVGIRFLWSIRTPKEYASP  
NEILPDGFMNRVMGLGLVCGWAPQVEILAHKAIGGFVSHCGWNSILESRLF  
VPIATWPMYAEQQLNAFTIVKELGLALEMRLDYVSEYGEIVKADEIAGAVRSL  
MDGEDVPRRKLKEIAEAGKEAVMDGGSSFVAVKRFIDGL\*

>AT2G15490

MNREQIHILFFPFMAHGHMIPLLDMAKLFARRGAKSTLLTPINAKILEKPIEA  
FKVQNPDLLEIGIKILNFPCVELGLPEGCENRDFINSYQKSDSFDLFLKFLFSTKY  
MKQQLESFIETTKPSALVADMFFPWATESAEKIGVPRLVFHGTSSFALCCSYNM  
RIHKPHKKVASSSTPFVIPGLPGDIVITEDQANVTNEETPFQKFWKEVRESETSS  
FGVLVNSFYELESSYADFYRSFVAKKAWHIGPLSLSNRGIAEKAGRGKKANID  
EQECLKWLDSKTPGSVVYLSFGSGTGLPNEQLLEIAFGLEGGQNFIVVSKN  
ENQVGTGENEDWLPKGFEERNKGGKGLIIRGWAPQVLILDHKAIGGFVTHCGW  
NSTLEGIAAGLPMVTWPMGAEQFYNEKLLTKVLRIGVNVGATELVKKGKLIS

RAQVEKAVREVIGGEKAEERRLRAKELGEMAKAAVEEGGSSYNDVNKFMEE  
LNGRK\*

>AT2G29730

MRNVELIFIPTPTVGHLPFLEFARRLIEQDDRIRITILLMKLQGQSHLDTYVKS  
IASSQPFVRFIDVPELEEKPTLGSTQSVEAYVYDVIERNIPLVRNIVMDILTSAL  
DGVKVKGLVVDFFCLPMIDVAKDISLPFYVFLTTNSGFLAMMQYLADRHSRD  
TSVFVRNSEEMLSIPGFVNPV PANVLPSALFVEDGYDAYVKLAILFTKANGILV  
NSSFDIEPYSVNHFLQE QNYPSVYAVGPIFDLKAQPHPEQDLTRRDELMKWLD  
DQPEASVVFLCFGSMARLRGSLVKEIAHGLELCQYRFLWSLRKEEVTKDDL  
EGFLDRVDGRGMICGWSPQVEILAHKAVGGFVSHCGWNSIVESLWFGVPIVT  
WPMYAEQQLNAFLMVKELKLAVELKLDYRVHSDEIVNANEIETAIRYVMDTD  
NNVVRKRVMDISQMIQRATKNGGSSFAAIEKFIYDVIGIKP\*

>AT1G07260

MKAEAEIIFVITYPSPGHLLVSIEFAKSLIKRDDRITITILY WALPLAPQAHLFAK  
SLVASQPRIRLLALPDVQNPPPLELFFKAPEAYILESTKKTVP LVRDALSTLVSS  
RKESGSRVVGLVIDFFCVPMIEVANELNLPSYIFLTCNAGFLSMMKY LPERHR  
ITTSELDLSSGNVEHIPGYVCSVPTKVLPPGLFVRESYEAWVEIAEKFP GAKGI  
LVNSVTCLEQNAFDYFARLDENYPPVYPVGPVLSLKDRPSPNLDASDRDRIMR  
WLEDQPESIVYICFGSLGIIGKLQIEEIAEALELTGHRFLWSIRTNPTEKASPYD  
LLEPGFLDRTASKGLVCDWAPQVEVLAHKALGGFVSHCGWNSVLES LWFV  
PIATWPMYAEQQLNAFSMVKELGLAVELRLDYVSAYGEIVKAEIAGAIRSLM  
DGEDTPRKRVKEMAEAAARNALMDGGSSFVAVKRFLDELIGGDV\*

>AT1G07250

MVKETELIFIPVSTGHILVHIEFAKRLINLDHRIHTITILNLSSPSSPHASVFARS  
LIASQPKIRLHDLPPIQDPPPFDLYQRAPEAYIVKLIKNTPLIKDAVSSIVASRR  
GGSDSVQVAGLVLDLFCNSLVKDVGNELNLPSYIYLTCNARYLGMMKYIPDR  
HRKIASFDLSSGDEELPVPGFINAIPTKFMPGFLFNKEAYEAYVELAPRFADA  
KGILVNSFTELEPHPFDYF SHLEKFPVYPVGPILSLKDRASPNEEAVDRDQIVG  
WLDDQPESV VFLCFGSRGSVDEPQVKEIARALELVGCRFLWSIRTS GDVETN  
PNDVLP EGFMRVAGRGLVCGWAPQVEVLAHKAIGGFVSHCGWNSTLES LW  
FGVPVATWPMYAEQQLNAFTLVKELGLAVDLRMDYVSSRGGLVTCDEIARAV  
RSLMDGGDEKRKKVKEMADAARKALMDGGSSSLATARFIAELFEDGSSC\*

>AT3G21790

MKFELVFIPYPGIGHLRSTVEMAKLLVDRETRLSISVILPFISEGEVGASDYIAA  
LSASSNNRLRYEVISAVDQPTIEMTTIEIHMKNQEPKVRSTVAKLLEDYSSKPD  
SPKIAGFVLDMFCTSMVDVANEFGPSYMFYTSSAGILSVTYHVQMLCDENK  
YDVSENDYADSEAVLNFPSLSRYPVKCLPHALANMWLPVFNQARKFRE  
MKGILVNTVAELEPYVLKFLSSSDTPPVYPVGP LLHLENQRDDSKDEKRLEIIR  
WLDQQPPSSV VFLCFGSMGGFGEEQVREIAIALERSGHRFLWSLRRASPNIFKE  
LPGEFTNLEEVLPEGFFDRTKDIGK VIGWAPQVAVLANPAIGGFVTHCGWNST  
LESLWFGVPTAAWPLYAEQKFNAFLMVEELGLAVEIRKYWRGEHLA GLPTAT  
VTAEIEKAIMCLMEQDSDVRKRVKDMSEKCHVALMDGGSSRTALQKFIEEV  
AKNIVSLDKEFEHVALK\*

>AT3G21800

MNKFALVFVPPILGHLKSTAEMAKLLVEQETRLSISIILPLLSGDDVSASAYIS  
ALSAASNDRLHYEVISDGDQPTVGLHVDNHIPMVKRTVAKLVDDYSRRPDS  
RLAGLVVDMFCISVIDVANEVSVPCYLFYTSNVGILALGLHIQMLFDKKEYSV  
SETDFEDSEVVDVPSLTCYPVKCLPYGLATKEWLPMYLNQGRRFREMKGIL  
VNTFAELEPYALESLSHSSGDTPRAYPVGPLLHLENHVDGSKDEKGS DILRWLD  
EQPPKSVVFLCFGSIGGFNEEQAREMAIALERSGHRFLWSLRRASRDIDKELPG  
EFKNLEEILPEGFFDRTKDKGKVIGWAPQVAVLAKPAIGGFVTHCGWNSILESL  
WFGVPIAPWPLYAEQKFNAFVMVEELGLAVKIRKYWRGDQLVGTATVIVTAE  
EIERGIRCLMEQDS DVRNRVKEMSKKCHMALKDGGSSQSALKLFIQDVTKYI  
A\*

>AT2G15480

MNREVSERIHILFFPFMAQGHMIPILDMAKLFSRRGAKSTLLTTPINAKIFEKPI  
EAFKNQNPDL EIGIKIFNFPCVELGLPEGCENADFINSYQKSDSGDLFLKFLFST  
KYMKQQLSFIE TT KPSALVADMFFPWATESAEKLGVPRLVFHGT SFFSLCCSY  
NMRIHKPHKKVATSSTPFVIPGLPGDIVITEDQANVAKEETPMGKFMKEVRESE  
TNSFGVLVNSFYELESAYADFYRSFVAKRAWHIGPLSLSNRELGEKARRGKKA  
NIDEQECLKWLD SKTPGSVVYLSFGSGTNFTNDQLLEIAFGLEGSGQSFIWVV  
RKNENQGDNEEWLPEGFKERTTGKGLIIPGWAPQVLILDHKAIGGFVTHCGW  
NSAIEGIAAGLPMVTWPMGAEQFYNEKLLTKVLRIGVNVGATELVKKGKLISR  
AQVEKAVREVIGGEKAEERLWAKKLGEMAKAAVEEGSSYN DVNKFMEEL  
NGRK\*

>AT5G53990

MGQNFHAFMFPWF AFGHMTPYLHLANKLAAKGHRVTFLLPKKAQKQLEHH  
NLPDRIFHSLTIPHVDGLPAGAETASDIPISLGKFLTAAMD LTRDQVEAAVRA  
LRPDLIFFDTAYWVPEMAKEHRVKSVIYFVISANSIAHELVP GGELGVPPP GYP  
SSKVLYRGHDAHALLTFSIFYERLHYRITTGLKNCDFISIRTCKEIEGKFCDYIE  
RQYQRKVLLTG PMLPEPDNSRPLEDRWNHWLNQFKPGSVIYCALGSQITLEK  
DQFQELCLGMELTGLPFLVAVKPPKGAKTIQEALPEGFEERVKNHGVVWGEW  
VQQPLILAHPSV GCFVTHCGFGSMWESLVSDCQIVLLPYLCDQILNTRLMSEE  
LEVSVEVKREETGWFSKESLSVAITSVMDK DSELGNLVR RNHAKLKEVLVSP  
GLLTGYTDEFVETLQ NIVNDTNLE\* >AT5G54010

MGSKFHAFMFPWFGFGHMTAFLHLANKLAEKDHKITFLLPKKARKQLESNL  
FPDCIVFQTLTIPSVDGLPDGAETTS DIPISLGSFLASAMDRTRIQVKEAVSVGK  
PDLIFFDFAHWIPEIAREYGVKSVNFITISAACVAISFVPGRSQDDL GSTPPGYPS  
SKVLLRGHETNSLSFLSYPGDGTSFYERIMIGLKNCDVISIRTCQEMEGKFC  
FIENQFQRKVLLTG PMLPEPDNSKPLEDQWRQWLSKFDPGSVIYCALGSQIILE  
KDQFQELCLGMELTGLPFLVAVKPPKGSSTIQEALPKGFEERVKARGVVWGG  
WVQQPLILAHPSIGCFVSHCGFGSMWEALVNDCQIVFIPHLGEQILNTRLMSE  
ELKVSVEVKREETGWFSKESLSGAVRSVMDR DSELGNWARRNHVKWKESLL  
RHGLMSGYLNKFVEALEKLVQINLE\*

>AT4G15260

MFCSSMIDIANEFVPCYMIYTSNATFLGITLHVQEMYDDK KYDVSDLDES  
NELEFPCLTRPYPVKCLPHILSSKD WLPFFAAQGRSFRKMKGILVNTVAELEPH  
ALKMFNNVDLPQAYPVGPVLHLDNGDDDDEKRLEVLRLWLD DQPPKSVLFLC

FGSMGGFTEEQTREVAVALNRSGRFLWSLRRASPNIMMERPGDYKNLEEVLPDGFLERTLDRGKVIWAPQVAVLEKPAIGGFVTHCGWNSMLESWFGVPMV TWPLYAEQKVNAFEMVEELGLAVEIRKCSGDLLIGEMEIVTAEDIERAIRCV MEQDSDVRSRVKEMAEEKCHVALMDGGSSKTALQKFIQDVIENVA\*

>AT2G29710

MRNAELIFIPTPTVGHLPFLEFARRLIEQDDIRITFLLMKQQGQSHLDSYVK TISSSLPFVRFIDVPELEEKPTLGTQSVEAYVYDFIETNVPLVQNIIMGILSSPAF DGVTVKGFVADFFCLPMIDVAKDASLPFYVFLTSNSGFLAMMQYLAYGHKKD TSVFARNSEEMLSIPGFVNPVPAKVLPSALFIEDGYDADVKLAILFTKANGILV NTSFDIEPTSLNHFLGGEENYPSVYAVGPIFNPKAHPHPDQDLACCDESMKWLD AQPEASVVFLCFGSMGSLRGPLVKEIAHGLELCQYRFLWSLRTEEVTNDDLLP EGFMDRVSGRGMICGWSPQVEILAHKAVGGFVSHCGWNSIVESLWFGVPIVT WPMYAEQQLNAFLMVKELKLAVELKLDYSVHSGEIVSANEIETAISCVMNKD NNVVRKRVMDISQMIQRATKNGGSSFAAIEKFIHDVIGTRT\*

>AT4G34135

MGSDDHHRKLHVMFFPFMAYGHMPTLDMAKLFSSRGAKSTILTSLNSKILQ KPIDTFKLNLPGLEIDIQIFNFPCVELGLPEGCENVDFFTSNNNDKNEMIVKF FFSTRFFKDQLEKLLGTTRPDCLIAMFFPWATEAAGKFNVPRLVFHGTGYFS LCAGYICIGVHKPQKRVASSSEPFVIPELPGNIVITEEQIIDGDGESDMGKFMTEV RESEVKSSGVVLSNFYELEHDYADFYKSCVQKRAWHIGPLSVYNRGFEKAE RGKKANIDEAECLKWLDSKKPNSVIYVSFGSVAFFKNEQLFEIAAGLEASGTS FIWVVRKTKDDREEWLPEGFEERVKGKGMIRGWAPQVLILDHQTGGFVTH CGWNSLLEGVAAGLPMVTWPVGAEQFYNEKLVTVLRTGVSVGASKHMKV MMGDFISREKVDKAVREVLAGEAAEERRRRAKKLAAMAKAAVEEGGSSFND LNSFMEEFSS\*

>AT4G27560

MGGLKFHVLMYPWFATGHMTPFLFLANKLAEKGHTVTFLIPKKALKQLENL NLFPHNIVFRSVTVPHVDGLPVGTTETVSEIPVTSADLLMSAMDLTRDQVEGVV RAVEPDLIFFDFAHWIPEVARDFGLKTVKYVVVSASTIASMLVPGGELGVPPPG YPSSKVLKRQDAYTMKNLESTNTINVGPNLLERVTTSLMNSDVIAIRTAREIE GNFCDYIEKHCRKKVLLTGPFVPEPDKTRELEERWVKWLSGYEPDSVVFAL GSQVILEKDQFQELCLGMELTGPFLVAVKPPRGSSTIQEALPEGFEERVKGRG VVWGEVWQQPLLSHPSVGCVFVSHCGFGSMWESLLSDCQIVLVPQLGDQVL NTRLLSDELKVSVEVAREETGWFSKESLFDAINSVMKRDSEIGNLVKKNHTK WRETLTSPGLVTGYVDNFIESLQDLVSGTNHVSK\*

>AT1G01390

MAEANTPHIAIMPSPGMGHLIPFVELAKRLVQHDCFTVTMIISGETSPSKAQRS VLNSLPSSIASVFLPPADLSDVPSTARIETRAMLTMTRSNPALRELFGLSTKKS LPAVLVDMFGADAFDVAVDVHVSPIFYASNANVLSFFLHLPKLDKTVSCEF RYLTEPLKIPGCVPITGKDFLDTVQDRNDDAYKLLLHNTKRYKEAKGILVNSF VDLESNAIKALQEPAPDKPTVYPIGPLVNTSSSNVNLEDKFGCLSWLDNQPFV SVLYISFGSGGTLTCEQFNELAIGLAESGKRFIWVIRSPSEIVSSSYFNPHSETDP FSFLPIGFLDRTKEKGLVVPWAPQVQILAHPTSCGFLTHCGWNSTLESIVNGV PLIAWPLFAEQKMNTLLLVEDVGAALRIHAGEDGIVRREEVVRVVKALMEGE

EGKAIGNKVKELKEGVVRVLGDDGLSSKSFGEVLLKWKTHQRDINQETSH\*

>AT4G15280

MKIELVFIPLPGIGHLRPTVKLAKQLIGSENRLSITIIIPSRFDAGDASACIASLTT  
LSQDDRLHYESISVAKQPPTSDPDPVPAQVYIEKQKTKVRDAVAARIVDPTRKL  
AGFVVDMFCSSMIDVANEFVPCYMVYTSNATFLGTMLHVQQMYDQKKYD  
VSELENSVTELEFFSLTRPYPVKCLPHILTSKEWLPLSLAQARCFRKMKGILVN  
TVAELEPHALKMFNINGDDLQVYYPVGPVHLHLENGNDDDEKQSEILRWLDEQ  
PSKSVVFLFCFGLGGFTTEEQTRETAVALDRSGQRFLWCLRHASPNIKTDRPRD  
YTNLEEVLPFGFLERTLDRGKVGWAPQVAVLEKPAIGGFVTHCGWNSILESL  
WFGVPMVTWPLYAEQKVNAFEMVEELGLAVEIRKYLKGDLFAGEMETVTAE  
DIERAIRRVMEQSDVRRNVKEMAEKCHFALMDGGSSKAALKFIQDVNIEM  
D\*

>AT3G21780

MKIELVFIPSPAISHLMATVEMAEQLVDKNDNLSITVIISFSSKNTSMITSLTSN  
NRLRYEIIISGGDQOPTTELKATDSHIQSLKPLVRDAVAKLVDSTLPDAPRLAGFV  
VDMYCTSMIDVANEFVPSYLFYTSNAGFLGLLHIQFMYDAEDIYDMSELE  
DSDVELVVPVSLTSPYPLKCLPYIFKSKEWLTFVVTQARRFRETGILVNTVPLD  
EPQALTFLSNGNIPRAYPVGPLLHLKNVNCYVDKKQSEILRWLDEQPPRSVV  
FLCFGSMGGFSEEQVRETALALDRSGHRFLWSLRRASPNILREPPGEFTNLEEI  
LPEGFFDRTANRGKVGWAEQVAILAKPAIGGFVSHGGWNSTLESWFGVPM  
AIWPLYAEQKFNAFEMVEELGLAVEIKKHWRGDLLLGRSEIVTAEIEKGIICL  
MEQSDVRRKRVNEISEKCHVALMDGGSSSETALKRFIQDV TENIAWSETES\*

>AT1G07240

MKTAELIFVPLPETGHLLSTIEFGKRLNLD RRISMITILSMNLPYAPHADASLA  
SLTASEPGIRIISLPEIHDPPPIKLLDTSSETYILDFIHKIPCLRKTIQDLVSSSSSS  
GGSSHVAGLILDFFCVGLIDIGREVNLPYIFMTSNFGFLGVLQYLPERQLTP  
SEFDESSGEEELHIPAFVNRVPAKVLPPGVFDKLSYGSLVKIGERLHEAKGILVN  
SFTQVEPYAAEHFSQGRDYPHVYPVGPVNLNLTGRTPGLASAQYKEMMKWL  
DEQPDSSVFLCFGSMGVFPAPQITEIAHALELIGCRFIWAIRTNMAGDGDQP  
PLPEGFVDRMTMGRGIVCSWAPQVDILAHKATGGFVSHCGWNSVQESLWYGV  
IATWPMYAEQQLNAFEMVKELGLAVEIRLDYVADGDRVTLEIVSADEIATAVR  
SLMDSNPVRKKVIEKSSVARKAVGDGGSSSTVATCNFIKDILGDHF\*

>AT3G16520

MGEEAIVLYPAPPIGHLVSMVELGKTILSKNPSLSIHIILVPPPYQPESTATYISSV  
SSSFPSITFHHLPAVTPYSSSSTSRHHHESLLEILCFSNPSVHRTLFSLSRNFNVR  
AMIIDFFCTAVLDITADFTFPVYFFYTSGAACLAFSFYLP TIDETTPGKNLKDIP  
VHIPGVPPMKGS DMPKAVLERDDEVYDVFIMFGKQLSKSSGIIINTFDALENR  
AIKAITEELCFRNIYPIGPLIVNGRIEDRNDNKAVSCLNWLD SQPEKSVVFLCFG  
SLGLFSKEQVIEIAVGLEKSGQRFLWVVRNPPELEKTELDLKSLLPEGFLSRTE  
DKGMVVKSWAPQVPVNLNHKAVGGFVTHCGWNSILEAVCAGVPMVAWPLYA  
EQRFNRMIVDEIKIAISMNESETGFVSSTEVEKRVQEIIGECVRRERTMAMKN  
AAELALTETDCNSDG\*

>AT2G29750

MKGQEDAELVIIPFPFSGHILATIELAKRLISQDNPRIHTITILYWG LPIFQADTI

AFLRSLVKNEPRIRLVTLPVQDPPPMELFVEFAESYILEYVKKMVPIIREALST  
LLSSRDESGSVRVAGLVLDFFCVP MIDVGNENLPSYIFLTCSAGFLGMMKYLP  
ERHREIKSEFNRSFNEELNLIPGYVNSVPTKVLPSGLFMKETYEPWVELAERFP  
EAKGILVNSYTALEPNGFKYFDRCPDNYPTIYPIGPILCSNDRPNLDSSEDRRIIT  
WLDDQPESVVFVLCFGLKNSATQINEIAQALEIVDCKFIWSFRTPNPKEYASP  
YEALPHGFMDRVMDQGIVCGWAPQVEILAHKAVGGFVSHCGWNSILES LGFG  
VPIATWPMYAEQQLNAFTMVKELGLALEMRLDYVSEDGDIVKADEIAGTVRS  
LMDGVDVPSKVKKEIAEAGKEAVDGGSSFLAVKRFIIDLIDGVSISK\*

>AT3G46670

MEEKPAGRRVVLVAVPAQGHISPIQLAKTLHLKGFSTIAQTKFNYFSPSDDF  
TDFQFVTIPESLPESDFEDLGP IEFHLKLNKECQVSFKDCLGQLLQQGNEIAC  
VVYDEFMYFAEAAAKEFKLPNVIFSTTSATAFVCRSAFDKLYANSILTPLKEPK  
GQQNELVPEFHPLRCKDFPVSHWASLESMMELYRNTVDKRTASSVIINTASCL  
ESSLSRLQQQLQIPVYPIGPLHLVASASTSLEENKSCIEWLNKQKKNSVIFVS  
LGSLALMEINEVIETALGLDSSKQQFLWVIRPGSVRGSEWIENLPKEFSKIISGR  
GYIVKWAPQKEVLSHPAVGGFWSHCGWNSTLESIGEGVPMICKPFSSDQMVN  
ARYLECVWKIGIQVEGLDRGAVERRMLMVEEEGEGMRKRAISLKEQLRA  
SVISGGSSHNSLEEFVHYMRTL\*

>AT3G21750

MKVELVFIPSPGVGHIRATTALAKLLVASDNRLSVTLIVIPSRVSDDASSSVYTN  
SEDRLRYILLPARDQTTDLVSYIDSQKPQVRVAVVSKVAGDVSTRSDSRLAGIVV  
DMFCTSMIDIADFNLSAYIFYTSNASYLGLQFHVQSLYDEKELDVSEFKDTE  
MKFDVPTLTQPFPAKCLPSVMLNKKWFPYVLGRARSFRATKGILVNSVADME  
PQALSSFFSGNGNTNIPPVYAVGPIMDLESSGDEEKRKEILHWLKEQPTKSVVF  
LCFGSMGGFSEEQAREIAVALERSGHRFLWSLRRASPVGNKSNPPPGEFTNLEE  
ILPKGFLDRTVEIGKIISWAPQVDVLNSPAIGAFVTHCGWNSILES LWFGVMA  
AWPIYAEQQFNAFHMVDELGLAAEVKKEYRRDFLVEEPEIVTAEIERGIKCA  
MEQDSKMRKRMEMKDKLHVALVDGGSSNCALKKFVQDVVDNVP\*

>AT2G22930

MEPTFHAFMFPWFVAFGHMIPFLHLANKLAEKGHQITFLLPKKAQKQLEHHNL  
FPDSIVFHPLTIPHVNGLPAGAETTS DISISMDNLLSEALDLTRDQVEAAVRALR  
PDLIFFDFAHWIPEIAKEHMIKSVSYMIVSATTIAYTFAPGGVLGVPPPYPSSK  
VLYRENDAHALATLSIFYKRLYHQITTFGKSCDIALRTCNEIEGKFCDYISSQY  
HKKVLLTGPMLEPQDTSKPLEEQLSHFSLRFPFRSVVFCALGSQIVLEKDQFQE  
LCLGMELTGLPFLIAVKPPRGSSSTVEEGLPEGFQERVKGRGVVWGGVWQQPLI  
LDHPSIGCFVNHCGPGTIWECLMTDCQMVLLPFLGDQVLFTRLMTTEEFKVS  
EVSREKTGWFSKESLSDAIKSVMDKSDLGKLVRSNHAKLKETLGSHGLLTG  
YVDKFVEELQEYLI\*

>AT3G53160

MCSHDPLHFVVIPFMAQGHMIPLVDISRLLSQRQGVTVCIITTTQNVAKIKTSL  
SFSSLFATINIVEVKFLSQQTGLPEGCESLDMLASMGDMVKFFDAANSLEEQV  
EKAMEEMVQPRPSCIIGDMSLPFTSRLAKKFKIPKLIFHGFCFSLMSIQVVRES  
GILKMIESNDEYFDLPGLPDKVEFTKPQVSVLQPV EGNMKESTAKIIEADNDS  
YGVIVNTFEELEVDYAREYRKARAGKVWCVGPVSLCNRLGLDKAKRGDKAS  
IGQDQCLQWLDSQETGSVLYVCLGSLCNLPLAQLKELGLGLEASNKPFIVVIR

EWGKYGDLANWMQQSGFEERIKDRGLVIKGWAPQVFILSHASIGGFLTHCGW  
NSTLEGITAGVPLLTWPLFAEQFLNEKLVVQILKAGLKIGVEKLMKYGKEEEIG  
AMVSRECVRKAVDELMDGSEAEERRRKVTELSDLANKALEKGGSSDSNITL  
LIQDIMEQSQNQF\*

>AT2G36760

MAFEKTRQFLPPLHFVLFPFMAQGHMIPMVDIARILAQRGVTTITIVTTPHNAA  
RFKDVLNRAIQSGLHIRVEHVKFPFQEAGLQEGQENVDFLDSMELMVHFFKA  
VNMLENPVMKLMMEEMKPKPSCCLISDFCLPYTSKIAKRFNIPKIVFHGVSCFCLL  
SMHILHRNHNILHALKSDKEYFLVPSFPDRVEFTKLQVTVKTNFSGDWKEIMD  
EQVDADDTSYGVIVNTFQDLESAYVKNYTEARAGKVWSIGPVSLCNKVGED  
KAERGNKAAIDQDECIKWLDSDKDVESVLYVCLGSICNLPLAQLRELGLGLEAT  
KRPFIVVIRGGGKYHELAEWILESGFEERTKERSLLIKGWSPQMLILSHPAVGG  
FLTHCGWNSTLEGITSGVPLITWPLFGDQFCNQKLIVQVLKAGVSVGVVEVM  
KWGEEESIGVLVDKEGVKKAVDEIMGESDEAKERRKRVRELGELAHKAVEEG  
GSSHSNIIFLLQDIMQQVESKS\*

>AT2G43840

MEKMRGHVLAVPFPSQGHITPIRQFCKRLHSGFKTTHTLTTFIFNTIHLDPSSP  
ISIATISDGYDQGGFSSAGSVPEYLQNFKTFGSKTVADIIRKHQSTDNPITCIVYD  
SFMFWALDLAMDGLAAAPFFTQSCAVNYINYLSYINNGSLTLPIKDLPLLELQ  
DLPTFVPTPTGSHLAYFEMVLQQFTNFDKADFLVNSFHDLDLHEEELLSKVCP  
VLTIGPTVPSMYLDQQIKSDNDYDLNLFDLKEAALCTDWLDRPEGSVVYIA  
FGSMAKLSSEQMEEIASAISNFSYLWVVRASEESKLPPGFLETVDKDKSLVLK  
WSPQLQVLSNKAIGCFMTHCGWNSTMEGLSLGVPMVAMPQWTDQPMNAKY  
IQDVWVGVVRVKAEEKESGICKREEIEFSIKEVMEGEKSKEMKENAGKWRDLA  
VKSLSEGGSTDININEFVSKIQIK\*

>AT2G36780

MATEKTHQFHPSLHFVLFPFMAQGHMIPMIDIARLLAQRGVTTITIVTTPHNAA  
RFKNVLNRAIESGLAINILHVKFPYQEFGLPEGKENIDSLDSTELMVPFFKAVN  
LLEDPMKLMMEEMKPRPSCCLISDWCLPYTSIIAKNFNIPKIVFHGMGCFNLLC  
MHVLRNLEILENVKSDEEYFLVPSFPDRVEFTKLQLPVKANASGDWKEIMD  
EMVKAETYSGVIVNTFQELEPPYVKDYKEAMDGKVWSIGPVSLCNKAGAD  
KAERGSKAAIDQDECLQWLDKKEEGSVLYVCLGSICNLPLSQLKELGLGLEES  
RRSFIWVIRGSEKYKELFEWMLSESGFEERIKERGLLIKGWAPQVLILSHPSVGG  
FLTHCGWNSTLEGITSGIPLITWPLFGDQFCNQKLVVQVLKAGVSAGVEEVM  
KWGEEDKIGVLVDKEGVKKAVEELMGDSDDAKERRRRVKELGELAHKAVEK  
GGSSHSNITLLLQDIMQLAQFKN\*

>AT2G31790

MSEAKKGHVLFPPYPLQGHINPMIQLAKRLSKKGITSTLIASKDHREPYTSDD  
YSITVHTIHDGFFPHEHPHAKFVDLDRFHNSTSRSLTDFISSAKLSDNPPKALIY  
DPFMPFALDIAKDLDLVYVAYFTQPWLASLVYYHINEGTYDVPVDRHENPTL  
ASFPGFPLLSQDDLPSFACEKGSYPLLHEFVVRQFSNLLQADCILCNTFDQLEP  
KVVKWMNDQWPVKNIGPVVPSKFLDNRLPEDKDYELENSKTEPDESVLKWL  
GNRPAKSVVYVAFGLVALSEKQMKEIAMAISQTGYHFLWSVRESERSKLPSPG  
FIEEAEEKDSGLVAKWVPQLEVLAHESIGCFVSHCGWNSTLEALCLGVPMVG

VPQWTDQPTNAKFIEDVWKIGVRVRTDGEGLSSKEEIARCIVEVMEGERGKEI  
RKNVEKLVAREAISEGGSSDKKIDEFVALLT\*

>AT3G46660

MQVLGMEEKPARRSVVLVPFPAQGHISPMMLAKTLHLKGFSTVQTKFNY  
FSPSDDFTHDFQFVTIPESLPESDFKNLGPIQFLKLNKECKVSFKDCLGQLVLQ  
QSNEISCVIYDEFMYFAEAAAKECKLPNIIFSTTSATAFACRSVFDKLYANNVQ  
APLKETKGQOEELVPEFYPLRYKDFPVS RFASLESIMEVYRNTVDRKTASSVII  
NTASCLESSLSFLQQQLQIPVYPIGPLHMVASAPTSLLEENKSCIEWLNKQK  
VNSVIYISMGSIALMEINEIMEVASGLAASNQHFLWVIRPGSIPGSEWIESMPEE  
FSKMVLDRGYIVKWAPQKEVLSHPAVGGFWSHCGWNSTLESIGQGVPMICRP  
FSGDQKVNARYLECVWKIGIQVEGELDRGVVERAVKRLMVDEEGEEMRKRA  
FSLKEQLRASVKSGGSSHNSLEEFVHFIRTL\*

>AT1G05680

MREGSHLIVLPFPGQGHITPMSQFCKRLASKGLKLTLLVSDKPSPPYKTEHDS  
ITVFPISNGFQEGEEPLQDLDDYMERVETSIKNTLPKLVEDMKLSGNPPRAIVY  
DSTMPWLLDVAHSYGLSGAVFFTQPWLVTAIYYHVFKGSFSVPSTKYGHSTL  
ASFPSFPLMTANDLPSFLCESSYPNLRIVVDQLSNIDRVDIVLCNTFDKLEEK  
LLKWVQSLWPVLNIGPTVPSMYLDKRLSEDKNYGFSLFNAKVAECMEWLNS  
KEPNSVVYLSFGSLVILKEDQMLELAAGLKQSGRFFLWVVRETETHKLPRNY  
VEEIGEKGLIVSWSPQLDVLAKHSIGCFLTHCGWNSTLEGLSLGVPMIGMPHW  
TDQPTNAKFMQDVWKVGVVRVKAEGDGFVRREEIMRSVEEVMEGEKKGKEIR  
KNAEKWKVLAQEAVSEGGSSDKSINEFVSMFC\*

>AT2G43820

MEHKRGHVLAVPYPTQGHITPFRQFCKRLHFKGLKTTLALTTFFVNSINPDL  
GPISIATISDGYDHGGFETADSIDDYLDKDFKTSKTIADIIQKHQTSNPNITCIV  
YDAFLPWALDVAREFGLVATPFFTQPCAVNYVYYSYINNGSLQLPIEELPFLE  
LQDLPSFFSVSGSPAYFEMVLQQFINFEKADFLVNSFQELHLENELWSKA  
CPVLTIGPTIPSIYLDQRIKSDTG YDLNLFESKDDSF CINWLDTRPQGSVVYVAF  
GSMAQLTNVQMEELASAVSNFSFLWVVRSSSEEEKLPSGFLETVNKEKSLVLK  
WSPQLQVLSNKAIGCFLTHCGWNSTMEALTFGVPMVAMPQWTDQPMNAKYI  
QDVWKAGVRVKTEKESGIAKREEIEFSIKEVMEGERSKEMKKNVKKWRDLA  
VKSLNEGGSTDTNIDTFVSRVQSK\*>AT3G46680

MEKMEEKKRIVLVPVPAQRHVTPMMLGTALNMKGFSTVVEGQFNKVSS  
QNFPGFQFVTIPDTESLPESVLERLGPVEFLFEINKTSEASFKDCIRQSLLQQGN  
DIACIIYDEYMYFCGAAAKEFNLSVIFSTQSATNQVSRCVLRKLSAEKFLVD  
MEDPEVQETLVENLHPLRYKDLPTSGVGPLDRLFELCREIVNKRTASAVIINTV  
RCLESSSLKRLQHELGPVYALGPLHITVSAASSLLEEDRSCVEWLNKQKPRSV  
VYISLGSVVQMETKEVLEMARGLFNSNQPFVIRPGSIAGSEWIESLPEEVIK  
MVSERGYIVKWAPQIEVLGHPAVGGFWSHCGWNSTLESIVEGVPMICRPFHG  
EQKLNALCLESIWRIQVQVQKVERGGVERAVKRLIVDEEGADMRRERALVLK  
ENLKASVRNGGSSYNAL EEIVNLM\*>AT3G21760

MKLELVFIPSPGDGHLRPLVEVAKLHVDRDDHLSITIIIPQMHGFSSSNSSSYIA  
SLSSDSEERLSYNVLSVPDKPDSDDTKPHFFDYIDNFKPQVKATVEKLTDPGPP  
DPSRLAGFVVDMMFCMM MIDVAN EFGVPSYMFYTSNATFLGLQVHVEYLYD

VKNYDVSDLKSDTTELEVPCLTRPLPVKCFPSVLLTKEWLPVMFRQTRRFRE  
TKGILVNTFAELEPQAMKFFSGVDSPLPTVYTVGPVMNLKINGPNSSDDKQSE  
ILRWLDEQPRKSVVFLCFGSMGGFREGQAKEIAIALERSGHRFVWSLRRRAQPK  
GSIGPPEEFTNLEEILPEGFLERTAEIGKIVGWAPQSAILANPAIGGFVSHCGWN  
STLESLWFGVPMATWPLYAEQQVNAFEMVEELGLAVEVRNSFRGDFMAADD  
ELMTAEEIERGIRCLMEQSDVRSRVKEMSEKSHVALMDGGSSHVALLKFIQD  
VTKNIS\*

>AT2G36770

MASEKSHKVHPPPLHFILFPFMAQGHMIPMIDIARLLAQRGATVTIVTTRYNAG  
RFENVLSRAMESGLPINIVHVNFYQEFGLPEGKENIDSYDSMELMVPFFQAV  
NMLEDPMKLMMEEMKPRPSCIISDLLLPYTSKIARKFSIPKIVFHGTGCFNLLC  
MHVLRRNLEILKNLKSDDYFLVPSFPDRVEFTKPQVPVETTASGDWKAFLDE  
MVEAEYTSYGVIVNTFQELEPAYVKDYTKARAGKVWSIGPVSLCNKAGADK  
AERGNQAAIDQDECLQWLDSKEDGSVLYVCLGSICNLPLSQLKELGLGLEKS  
QRSFIWVIRGWKEYNELYEWMMESGFEEIKERGLLIKGWSPQVLILSHPSVG  
GFLTHCGWNSTLEGITSGIPLITWPLFGDQFCNQKLVVQVLKAGVSAGVEEV  
MKWGEEEKIGVLVDKEGVKKAVEELMGASDDAKERRRRVKELGESAHKAVE  
EGGSSHSNITYLLQDIMQQVKSKN\*

>AT5G38040

MEEKLSRRRRVVLVPVPAQGHITPMIQLAKALHSKGFSTVVQTKFNLYNPSN  
DLSDFQFVTIPENLPVSDLKNLGPGRFLIKLANECYVSFKDLLGQLLVNEEEI  
ACVIYDEFMYFVEVAVKEFKLRNVILSTTSATAFVCRFVMCELYAKDGLAQLK  
EGGEREVELVPELYPIRYKDLSSVFASVESSVELFKNTCYKGTASSVIINTVRC  
LEMSSLEWLQQUELEIPVYSIGPLHMVVSAPPTSLEENESCIEWLNKQKPSSVI  
YISLGSFTLMETKEMLEMAYGFVSSNQHFLWVIRPGSICGSEISEEELLKMMVI  
TDRGYIVKWAPQKQVLAHSAVGAFWSHCGWNSTLESLGEGVPLICRPFTTDQ  
KGNARYLECVWKVGIQVEGELERGAIERAVKRLMVDEEGEEMKRRALSKE  
KLKASVLAQGSSHKSLDDFIKTL\*

>AT1G64910

MGQTFHAFMFPWFVAFGHMTPYLHLANKLAERGHRTFLIPKKAQKQLEHLNL  
FPDSIVFHSALTIPHDGLPAGAETFSDIPMPLWKFLPPAIDLTRDQVEAAVSALSP  
DLILFDIASWVPEVAKEYRVKSMLYNIISATSIAHDFVPGGELGVPPPYPSSKL  
LYRKHDAHALLSFSVYKRFSHRLITGLMNCDFISIRTCKEIEGKFCEYLERQY  
HKKVFLTGPMLPEPNKGKPLEDRWSHWLNGFEQGSVVFALGSQVTLEKDQ  
FQELCLGIELTGLPFFVAVTPPKGAKTIQDALPEGFEERVKDRGVVLGEWVQQ  
PLLAHPSVGCFLSHCGFGSMWESIMSDCQIVLLPFLADQVLNTRLMTEELKV  
SVEVQREETGWFSKESLSVAITSVMDQASEIGNLVRRNHSLKKEVLVSDGLLT  
GYTDKFVDTLENLVSETKRE\*

>AT1G51210

MNRAMPQRPETIRGSLKPHIMVFPYPAQGHLLPLLDLTHQLCLRGLTVSIIVT  
PKNLPYLSPLLSAHPASVSVTLPPFHHPLIPSGVENVKDLGGYGNPLIMASLR  
QLREPIVNWLSHPNPPVALISDFFLGWTKDLGIPRAFFSSGAFLASILHFVSD  
KPHLFESTEPVCLSDLPRSPVFKTEHLPSLIPQSPLSQDLESVKDSTMNFSSYGC  
IFNTCECLEEDYMEYVKQKQVSENRVFGVGPLSSVGLSKEDSVSNVDAKALLS  
WLDGCPDDSPLYICFGSQKVLTKEQCDLALGLEKSMTRFVWVVKKDPIDG

FEDRVAGRGMIVRGWAPQVAMLSHVAVGGFLIHCGWNSVLEAMASGTMILA  
WPMEADQFVDARLVVEHMGVAVSVCEGGKTVDPYEMGRIIADTMGESGGE  
ARARAKEMG\*

>AT1G05675

MREGSHVIVLPPFAQGHITPMSQFCKRLASKSLKITLVLVSDKPSPPYKTEHDTI  
TVVPISNGFQEGQERSEDLDEYMERVESSIKNRLPKLIEDMKLSGNPPRALVY  
DSTMPWLLDVAHSYGLSGAVFFTQPWLVS AIYYHVFKGSFSVPSTKYGHSTL  
ASFPSLPILNANDLPSFLCESSYPYILRTVIDQLSNIDRVDIVLCNTFDKLEEKL  
LKWIKSVWPVLNIGPTVPSMYLDKRLAEDKNYGFSLFGAKIAECMEWLNSK  
QPSSVYVVSFGLSVLKKDQLIELAAGLKQSGHFFLWVVRETERRKL PENYIE  
EIGEKGLTVSWSPQLEVLTHKSIGCFVTHCGWNSTLEGLSLGVPMIGMPHWA  
DQPTNAKFMEDVWKVGV RVKADSDGFVRRREEFVRRVEEVMEAEQGKEIRK  
NAEKWKVLAQEAVSEGGSSDKNINEFVSMFC\*

>AT5G03490

MTEVLLLPGTKSENSKPPHIVVFPFAQGHLLPLLDLTHQLCLRGFNVSIVVTP  
GNLTYLSPLLSAHPSSVTSVVFPPPHPSLSPGVENVKDVGNNGNLPIMASLRQ  
LREPIINWFQSHPNPIALISDFFLGWTHDLCNQIGIPRFAFFSISFFLVSVLQFCF  
ENIDLIKSTDPIHLLDLPRAPIFKEEHLPSIVRRSLQTPSPDLESIKDFSMNLLSY  
GSVFNSSEILEDYLQYVKQRMGHDRVYVIGPLCSIGSGLKSNSGSVDPSLLS  
WLDGSPNGSVLYVCFGSQKALTQDCDALALGLEKSMTRFVWVVKKDIPIPD  
GFEDRVSGRGLVVRGWVSQLAVLRHVAVGGFLSHCGWNSVLEGITSGAVILG  
WPMEADQFVNARLLVEHLGVAVRVCEGGETVPDSDELGRVIAETMGEGGREV  
AARAEIIRKTEAAVTEANGSSVENVQRLVKEFEKV\*

>AT3G29630

MGSKFHAFLYPWFGFGHMIPYLHLANKLAEKGHRVTFLAPKKAQKQLEPLNL  
FPNSIHFENVTLPHVDGLPVGAETTADLPNSSKRVLADAMDLLREQIEVKIRSL  
KPDLIFFDFVDWIPQMAKELGIKSVS YQIISA AFIAMFFAPRAELGSPPPGFSS  
KVALRGHDANIYSLFANTRKFLFDRVTTGLKNCDVIAIRTC AEIEGNLCDFIER  
QCQRKVLTTGPMFLDPQGKSGKPLEDRWNNWLNGFEPSSVYCAFGTHFFFE  
IDQFQELCLGMELTGLPFLVAVMPPRGSSTIQEALPEGFEERIKGRGIVWGGWV  
EQPLILSHPSIGCFVNHCFGFSMWESLSDCQIVFIPQLVDQVLTRLLTEELEV  
SVKVKRDEITGWFSKESLRDTVKSVM DKNSEIGNLVRRNHKKLKETLVSPGL  
LSSYADKFVDELENIHHSKN\* >AT1G22400

MGSQIIHNSQKPHVVCVPYPAQGHINPMMRVAKLLHARGFYVTFVNTVYNH  
NRFLRSRGSNALDGLPSFRFESIADGLPETDMDATQDITALCESTMKNCLAPFR  
ELLQRINAGDNVPPVSCIVSDGCMSFTLDVAEELGVPEVLFWTTSGCAFLAYL  
HFYLFIEKGLCPLKDES YLTKEYLEDVIDFIPTMKNVKLKDIPSFIRTTNPDDV  
MISFALRETERAKRASAIILNTFDDLEHDV VHAMQSILPPVYSVGPLHLLANRE  
IEEGSEIGMMSSNLWKEEMECLDWLDTKTQNSVIYINFGSITVLSVKQLVEFA  
WLAGSGKEFLWVIRPDLVAGEEAMVPPDFLMETKDRSMLASWCPQEKVLS  
HPAIGGFLTHCGWNSILESLSGVP MCVWPFFADQQMNCKFCCDEWDVGIEI  
GGDVKREEVEAVVRELMDGEKGGKMREKAVEWQRLAEKATEHKL GSSVMN  
FETVVSKFLLGQKSQD\*

>AT1G78270

MEQHGGSSSQKPHAMCIPYPAQGHINPMLKLAKLLHARGFHVTFVNTDYNH  
RRILQSRGPHALNGLPSFRFETIPDGLPWTDVDAKQDMLKLIDSTINNCLAPFK  
DLILRLNSGSDIPPVSCIISDASMSFTIDAAEELKIPVLLWTNSATALILYLHYQ  
KLIEKEIPLKDSSDLKKHLETEIDWIPSMKKIKLKDFPDFVTTTNPQDPMISFIL  
HVTGRIKRASAFINTFEKLEHNVLSSLRSLLPQIYSVGPFFQILENREIDKNSEIR  
KLGLENLWEEETESLDWLDTKAEKAVIYVNFSGSLTVLTSEQILEFAWGLARSGK  
EFLWVVRSGMVDGDDSIPLAEFLSETKNRGMILIKGWCSQEKVLSHPAIGGFLT  
HCGWNSTLESYAGVPMICWPFADQLTNRKFCCEWGWIGMEIGEEVKRERV  
ETVVKELMDGEKGRLEKVVWRRLAEEASAPPLGSSYVNFETVVNKVLT  
CHTIRST\*

>AT5G59590

MEEKQVKETRIVLVPVPAQGHVTPMMQLGKALHSGKFSITVVLTQSNRVSSS  
KDFSDHFLTIPGSLTESDLQNLGPQKFVLKLNQICEASFKQCIGQLLHEQCNN  
DIACVVYDEYMYFSHA AVKEFQLPSVVFSTTSATAFVCRSVLSRVNAESFLID  
MKDPETQDKVFPGLHPLRYKDLPTS VFGPIESTLKVYSETVNTRTASAVIINSA  
SCLESSSLARLQQQLQVPVYPIGPLHITASAPSSLLEEDRSCVEWLNKQKNSV  
IYISLGLALMDTKDMLEMAWGLSNSNQPFLLWVVRPGSIPGSEWTESLPEEFN  
RLVSEYGYIVKWAPQMEVLRHPAVGGFWSHCGWNSTVESIGEGVPMICRPFT  
GDQKVNARYLERVWRIGVQLEGDLKETVERAVEWLLVDEEGAEMRKRAID  
LKEKIETSVRSGSSCSSLDDFVNSM\*

>AT5G59580

MEELGVKRRIVLVPVPAQGHVTPIMQLGKALYSKGFSTVVLTQYNRVSSSKD  
FSDHFLTIPGSLTESDLKNLGPFKFLKLNQICEASFKQCIGQLLQEQGNDIAC  
VVYDEYMYFSSQA AVKEFQLPSVLFSTTSATAFVCRSVLSRVNAESFLDMKDP  
KVSDKEFPGLHPLRYKDLPTS AFGPLESILKVYSETVNIRTASAVIINSTSCLESS  
SLAWLQKQLQVPVYPIGPLHIAASAPSSLLEEDRSCLEWLNKQKIGSVIYISLG  
SLALMETKDMLEMAWGLRNSNQPFLLWVIRPGSIPGSEWTESLPEEFSRLVSEY  
GYIVKWAPQIEVLRHPAVGGFWSHCGWNSTLESIGEGVPMICRPFTGDQKVN  
ARYLERVWRIGVQLEGELDKGTVERAVERLIMDEEGAEMRKRVINLKEKLQA  
SVKSRGSSSFSSLDNFVNSLKMFM\*

>AT1G73880

MKVNEENNKPTKTHVLIFPFAQGHMIPLLDFTHRLALRGAALKITVLVTPK  
NLPFLSPLLSAVVNIEPLILPFPSPSIPSGVENVQDLPPSGFPLMIHALGNLHAP  
LISWITSHPSPPVAIVSDFLWTKNLGIPRDFSPSAAITCCILNTLWIEMPTKI  
NEDDDNEILHFPKIPNCPKYRFDQISSLYRSYVHGDPAWEFIRDSFRDNVASWG  
LVVNSFTAMEGVYLEHLKREMGHDRVWAVGPIIPLSGDNRGGPTSVSVDHVM  
SWLDAREDNHVYVCFGSQVVLTKQTLALASGLEKSGVHFIWAVKEPVEK  
DSTRGNILDGFDDRVAGRGLVIRGWAPQVAVLRHRAVGAFLTHCGWNSVVEA  
VVAGVLMILTWP MRADQYTDASLVVDELKVGVRACEGPDTVPDPDELARVFA  
DSVTGNQTERIKAVELRKAALDAIQERGSSVNDLDGFIQHVVSLGLNK\*

>AT3G46700

MEKRVEKRRIVLPLPLLGHFTPMQLGQALILKGFSTIIVPQGEFNRVNSSQKF  
PGFQFITIPDSELEANGPVGSLTQLNKIMEASFKDCIRQLLKQQGNDIACIIYDE  
FMYFCGAVAEELKLPNFIFSTQTATHKCCNVLSKLNKAKKYLIDMEEHDVQN

KVVENMHPLRYKDLPTATFGELEPFLELCRDVVNKRTASAVIINTVTCLESSSL  
TRLQQELQIPVYPLGPLHITDSSTGFTVLQEDRSCVEWLNKQKPRSVIYISLGS  
MVLMEKEMLEMAWGMLNSNQPLWVIRPGSVSGSEGIESLPEEVSKMVLE  
KGYIVKWAPQIEVLGHPSVGGFWSHCGWNSTLESIVEGVPMICRPYQGEQML  
NAIYLESVWRIGIQVGGELERGAVERAVKRLIVDKEGASMRERTLVLKEKLKA  
SIRGGGSSCNALDELVKHLKTE\* >AT3G11340

METRETKPVIFLFPFPLQGHNLNPMFQLANIFFNRGFSITVIHTEFNSPNSSNFPHF  
TFVSIPDSLSEPESEYPDVIEILHDLNSKCVAPFGDCLKKLISEEPTAACVIVDAL  
WYFTHDLTEKFNFRIVLRTVNLSAFVAFSKFHVLRKGYLSLQETKADSPVP  
ELPYLRMKDLPWFQTEDPRSGDKLQIGVMKSLKSSSGIIFNAIEDLETQDLDE  
ARIEFPVPLFCIGPFHRYVSASSSSLLAHDMTCLSWLDKQATNSVIYASLGSIAS  
IDSEFLEIAWGLRNSNQPLWVVRPGLIHGKEWIEILPKGFIENLEGRGKIVK  
WAPQPEVLAHRATGGFLTHCGWNSTLEGICEAIPMICRPSFGDQRVNARYIND  
VWKIGLHLENKVERLVIENAVRTLMTSSEGEIRKRIMPMKETVEQCLKLGGS  
SFRNLENLIAYILSF\*

>AT3G55710

MEERKVKRIIMFPLPFTGHFNPMIELAGIFHNRRGFSVTILHTSFNFPDPSRHPQF  
TFRTITHKNEGEEDPLSQSETSSGKDLVVLISLLKQYYTEPSLAEEVGEGETVC  
CLVSDALWGRNTEIVAKEIGVCTMVMRTSGAATFCAYTAFPLLDKGYLPIQGS  
RLDELVTELPPLKVKDLPVIKTKEPEGLNRILNDMVEGAKLSSGVVWNTFEDL  
ERHSLMDCRSKLQVPLFPIGPFHKHRTDLPPKPKNKDKDDDEILDWLNKQAP  
QSVVYVSFGSLAAIEENEFFEIAWGLRNSELPFLWVVRPGMVRGTEWLES LPC  
GFLENIGHQ GKIVKWNQLETLAHPAVGAFWTHCGWNSTIESICEGVPMICTP  
CFSDQHV NARYIVDVWRVGMMLERCKMERTEIEKVVT SVMMENGAGLTEM  
CLELKEKANVCLSEDGSSSKYLDKLVSHVLSFDSSAFAS\*

>AT3G46650

MEKKMEAKRRIVLVPIPAQGHVTPMLQLGKVLNSKGFSTVVEGHFNQVSSSS  
QHFPGFQFVTIKESLPESEFEKLG GIESMITLNKTSEASFKDCISQLLLQQGNDI  
ACIYDEYMYFCGAAAKEFSIPSVIFSTQSAANYVSHPDMDKVVENLYPLRY  
KDLPTSGMGPLDRFFELCREVANKRTASAVIINTVSCLESSSLSWLEQKVGISV  
YPLGPLHMTDSSPSSLLEDRSCIEWLNKQKPKSVIYISIGTLGQMETKEVLEM  
SWGLCNSNQPLWVIRAGSILGTNGIESLPEDVNKMVSERGYIVKRAPQIEVL  
GHPAVGGFWSHCGWNSILESIGEGVPMICKPFHGEQKLNAMYLECVWKIGIQ  
VEGDLERGAVERAVKRLTVFEEGEEMRKRAVTLKEELRASVRGGGSLHNSLK  
EFEHFMMTL\*

>AT2G31750

MGEKAKANVLVFSFPIQGHINPLLQFSKRLLSKNVNVTFLTTSSTHNSILRRAIT  
GGATALPLSFVPIDGFEEDHPSTDTSPDYFAKFQENVSRSLSELISSMDPKPNA  
VVYDSCLPYVLDVCRKHGVAASFFTQSSTVNATYIHFLRGEFKEFQNDVVL  
PAMPPLKGNLDPVFLYDNNLCRPLFELISSQFVNVDDIDFFLVNSFDELEVEVL  
QWMKNQWPVKNIGPMIPSMYLDKRLAGDKDYGINLFNAQVNECLDWLDSK  
PPGSVIYVSFGSLAVLKDDQMIEVAAGLKQTGHNFLWVRETETKKLPSNYIE  
DICDKGLIVNWSPLQVLAHKSIGCFMTHCGWNSTLEALSLGVALIGMPAYSD  
QPTNAKFIEDVWKVGVVRVKADQNGFVPEEIVRCVGEVMEDMSEK GKEIRK

NARRLMEFAREALSDGGNSDKNIDEFVAKIVR\*

>AT5G38010

MEEKQERRRRIVLIPAPAQGHISPMMLARALHLKGFSTVAQTKFNYLKPSK  
DLADFQFITIPESLPASDLKNLGPVWFLKLNKECEFSFKECLGQLLLQKQLIPE  
EEIACVIYDEFMYFAEAAAKEFNLPKVFSTENATAFACRSAMCKLYAKDGLA  
PLKEGCGREEELVPKLHPLRYKDLPTSAFAPVEASVEVFKSSCDKGTASAMIIN  
TVRCLEISSLEWLQQLKIPIYPIGPLHVMVSSAPPTSLLDENESCIDWLNKQKPS  
SVIYISLGSFTLLETKEVLEMASGLVSSNQHFLWVIRPGSILGSELTNEELLSMM  
EIPDRGYIVKWAPQKQVLAHSAVGAFWSHCGWNSTLESMGEGVPMICRPFTT  
DQKVNARYVECVWRVGVQVEGELKRGVVERAVKRLLVDEEGEEMKLRALS  
LKEKLVSVLPGGSSHSSLDLTKL\* >AT2G36750

MASEFRPPLHFVLPFMAQGHMIPMVDIARLLAQRGVTITIVTTPQNAGRFRKN  
VLSRAIQSGLPINLVQVKFPSQESGSPGQENLDLLDSLGLASLTFFKAFSLLEEP  
VEKLLKEIQRPNCIIADMCLPYTNRIAKNLGIPKIIFHGMCCFNLLCTHIMHQ  
NHEFLETIESDKEYFPIPNFPDRVEFTKSQLPMVLVAGDWKDFLDGMTEGDNT  
SYGVIVNTFEELEPAYVRDYKKVKAGKIWSIGPVSLCNKLGEDQAERGNKADI  
DQDECIKWLDSKEEGSVLYVCLGSICNLPLSQLKELGLGLEESQRPFIVVIRG  
WEKYNELLEWISESGYKERIKERGLLITGWSPQMLILTHPAVGGFLTHCGWNS  
TLEGITSGVPLLTWPLFGDQFCNEKLAVQILKAGVRAGVEESMRWGEEEKIGV  
LVDKEGVKKAVEELMGDSNDAKERRKRVKELGELAHKAVEEGSSHSNITFL  
LQDIMQLEQPKK\*

>AT5G54060

MGVFGSNESSMSIVMYPWLAFGHMTPFLHLSNKLAEKGHKIVFLLPKKALN  
QLEPLNLYPNLITFHTISIPQVKGLPPGAETNSDVPFFLTHLLAVAMDQTRPEVE  
TIFRTIKPDLVYDSAHWIPEIAKPIGAKTVCFNIVSAASIALSLVPSAEREVIDG  
KEMSGEELAKTPLGYPSKVVLRPHEAKSLSFVWRKHEAIGSFFDGKVTAMR  
NCDIAIARTCRETEGKFCDYISRQYSKPVYLTGPVLPQSQPNSLDPQWAEW  
LAKFNHGSVVFCAFGSQPVVVKIDQFQELCLGLESTGFPFLVAIKPPSGVSTVE  
EALPEGFKERVQGRGVVFGGWIQPLVLNHPVSGCFVSHCGFGSMWESLMS  
DCQIVLVPQHGEQILNARLMTEEMEVAVEVEREKKGWFSRQSLENVKSVM  
EGSEIGEKKVRKNHDKWRCVLTDSGFSGDYIDKFEQNLIELVKS\*

>AT2G36800

MVSETTKSSPLHFVLPFMAQGHMIPMVDIARLLAQRGVITITIVTTPHNAARF  
KNVLNRAIESGLPINLVQVKFPYLEAGLQEGQENIDSLDTMERMIPFFKAVNFL  
EEPVQKLIEMNPRPSCLISDFCLPYTSKIAKKNIPKILFHGMGCFLLCMHV  
LRKNREILDNLKSDKELFTVPDFPDRVEFTRTQVPVETYVPAGDWKDIFDGMV  
EANETSYGVIVNSFQLEPAYAKDYKEVRSKAWTIGPVSLCNKVGADKAER  
GNKSDIDQDECLKWLDSKKHGSVLYVCLGSICNLPLSQLKELGLGLEESQRPF  
IWWIRGWEKYKELVEWFSESGFEDRIQDRGLLIKGWSPQMLILSHPSVGGFLT  
HCGWNSTLEGITAGLPLLTWPLFADQFCNEKLVVEVLKAGVRSQVEQPMKW  
GEEEKIGVLVDKEGVKKAVEELMGESDDAKERRRRAKELGDSAHKAVEEG  
SSHSNISFLLQDIMELAEPPN\*

>AT1G64920

MGQKIHFMPWFVAFGHMTPYLHLGNKLAEKGHRVTFLPKKAQKQLEHQN

LFPHGIVFHPLVIPHVDGLPAGAETASDIPISLVKFLSIAMDLTRDQIEAAIGALR  
PDLILFDLAHWVPEMAKALKVKSMLYNVMSATSIAHDLVPGGELGVAPPGYP  
SSKALYREHDAHALLTFSGFYKRFYHRFTTGLMNCDFISIRTCEEIEGKFCDYIE  
SQYKKKVLTLTGPMLEPDKSKPLEDQWSHWLSGFGQGSVVFALGSQTILEK  
NQFQELCLGIELTGLPFLVAVKPPKGANTIHEALPEGFEERVKGRGIVWGEWV  
QQPSWQPLILAHPSVGCFFVSHCGFGSMWESLMSDCQIVFIPVLNDQVLTRV  
MTEELEVSVQREETGWFSKENLSGAIMSLMDQDSEIGNQVRRNHSLKET  
LASPGLLTGYTDKFDVTLENLVNEQGYIS\*

>AT3G53150

MESKIVSKAKRLHFVLIPLMAQGHILPMVDISKILARQGNIVTIVTTPQNASRF  
AKTVDRARLESGLEINVVKFPIPYKEFGLPKDCETLDTLPSKDLLRRFYDAVD  
KLQEPMERFLEQQDIPPSCHSDKCLFWTSRTAKRKFIPRIVFHGMCCFSLSSH  
NIHLHSPHLSVSSAVEPPIPMPHRIEIAAQLPGAFEKLANMDDVREKMRES  
ESEAFGVIVNSFQELEPGYAEAYAEAINKKVWFVGPVSLCNDRMADLDFDRGS  
NGNIAISETTECLQFLDSMRPRSVLYVSLGSLCRLIPNQLIELGLGLEESGKPFIV  
VIKTEEKHMIELDEWLKRENFEERVGRGIVIKGWSPQAMILSHGSTGGFLTH  
CGWNSTIEAICFGVPMITWPLFAEQFLNEKLIVEVLNIGVRVGVVEIPVRWGDEE  
RLGVLVKKPSVVKAIKLLMDQDCQRVDENDDDNEFVRRRRRIQELAVMAKK  
AVEEKGSSSINVSILIQDVLEQLSLV\*

>AT4G09500

MEPKFHAFMFPWFVAFGHMIPFLHLANKLAEKGHRVTFLPKKAQKQLEHHN  
LFPDSIVFHPLTVPPVNGLPAGAETTSIPISLDNLLSKALDLTRDQVEAAVRAL  
RPDLIFFDFAQWIPDMAKEHMIKSVSIIVSATTIAHTHVPGGKLGVRPPGYPS  
SKVMFRENDVHALATLSIFYKRLYHQITTGLKSCDVIALRTCKEVEDTSKPLEE  
RWNHFLSGFAPKSVVFCSPGSQVILEKDQFQELCLGMELTGLPFLAVKPPRGS  
STVQEGLEPEGFEERVKDRGVVWGGWVQQPLILAHPSIGCFVNHCGPGTIWES  
LVSDCQMVLPFLSDQVLFTRLMTEEFVSVVPREKTGWFSKESLSNAIKSV  
MDKDSDIGKLVRSNHTKLKEILVSPGLLTGYVDHFVEGLQENLI\*

>AT5G17050

MTKPSDPTRDSHVAVLAFPPGTHAAPLLTVTRRLASASPSTVFSFFNTAQSNSS  
LFSSGDEADR PANIRVYDIADGVPEGYVFSGRPQEAIELFLQAAPENFRREIAK  
AETEVGTEVKCLMTDAFFWFAADMATEINASWIAFWTAGANSLSAHLYTDLI  
RETIGVKEVGERMEETIGVISGMEKIRVKDTPGCVVFGNLDSVFSKMLHQMG  
LALPRATAVFINSFEDLDPTLTNNLRSRFRKRYLNIGPLGLLSSTLQQLVQDPHGC  
LAWMEKRSSGSVAYISFGTVMTPPPGELAAIAEGLESSKVPFVWSLKEKSLVQ  
LPKGFLDRTREQGIVVPWAPQVELLKHEATGVFVTHCGWNSVLESVSGGVPM  
ICRPFPGDQRLNGRAVEVVWEIGMTIINGVFTKDGFEKCLDKVLVQDDGKKM  
KCNAKKLRELAYEAVSSKGRSSENFRLLDVAVNII\*

>AT5G14860

MAVSSSHHAVLFPYMSKGHTIPLLQFARLLLRRHRIVSVDDDEPTISVTVFTTP  
KNQPFVSNFLSDVASSIKVISLPPENIAGIPPGVESTDMPLSISLYVPFTRATKSL  
QPFFEAELKNLEKVSFMVSDGFLWWTSESAKFEIPRLAFYGMNSYASAMCS  
AISVHELFTKPEVKSDEPVTVPDFPWICVKKCEFDVLTPEPDQSDPAFELLID  
HLMSTKKSARGVIVNSFYELESTFVDYRLRDNDPEKPCWCVGPLCLVNPPKPED

KPDWIHWLDRKLEERCVMYVAFGTQAEISNEQLKEIALGLEDSKVNFLWVT  
RKDLEEV TGGLGFEKRVKEHGMIVRDWVDQWEILSHKSVKGFLSHCGWNSA  
QESICAGVPLLAWPMMAEQPLNAKLVVEELKIGVRIETEDVSVKGFVTREELS  
RKVKQLMEGEMGKTTMKNVKEYAKMAKKAMAQGTGSSWKSLSLLEELC  
KSREPDGVNKLSSSDA\*

>AT2G36970

MERAKSRKPHIMMIPYPLQGHVIPFVHLAIKLASHGFTITFVNTDSIH HHISTAH  
QDDAGDIFSAARSSGQHDIRYTTVSDGFPLDFDRSLNHDQFFEGILHVFSAHV  
DDLIAKLSRRDDPPVTCLADTFYVWSSMICDKHNLVNVFWTEPALVLNLYY  
HMDLLISNGHFKSLDNRKDVIDYVPGVKAIEPKDLMSYLQVSDKDVDNTV  
VYRILFKAFKDVKRADFVVCNTVQELEPDSLSALQAKQPVYAIGPVFSTDSVV  
PTSLWAESDCTEWLKG RPTGSVLYVSFGSYAHVKGKKEIVEIAHG LLLSGISFIW  
VLRPDIVGSNVPDFLPAGFVDQAQDRGLVVQWCCQMEVISNPAVGGFFTHCG  
WNSILESVCGLPLLCYPLLDQFTNRKLVVDDWCIGINLCEKKTITRDQVSA  
NVKRLMNGETSSELRNNVEKVKRHLKDAVTTVGSSETNFNLFVSEVRNRIET  
KLCNVNGLEISPSN\*

>AT5G12890

MAEAKPRNLRIVMFPFMGQGHIPFVALALRLEKIMIMNRANKTTISMINTPSN  
IPKIRSNLPPESISLIELPFNSSDHGLPHDGENFDSL PYSLVISLLEASRSLREPFR  
DFMTKILKEEGQSSVIVIGDFFLGWIGKVCKEVGVYSVIFSASGAFGLGCYRSI  
WLNLPHKETKQDQFLDDFPEAGEIEKTQLNSFMLEADGTDDWSVFMKKIIP  
GWSDFDGFNFNTVAEIDQMGLSYFRRITGVPVWPVGPVLKSPDKKVGSRSTE  
EAVKSWLDSKPDHSVVYVCFGSMNSILQTHMLELAMALESSEKNFIWVVRPP  
IGVEVKSEFDVKGYLPEGFEERITR SERGLLVKKWAPQVDILSHKATCVFLSHC  
GWNSILESLSHGVP LLGWPMMAEQFFNSILMEKHIGVSVEVARGKRCEIKCDD  
IVSKIKLVMEETE VVGKEIRKKAREVKELVRRAMVDGVKGS SVIGLEEF LDQA  
MVKKVEN\*

>AT1G22360

MGS HVAQKQHVVCPYPAQGHINPMMKVAKLLYAKGFHITFVNTVYNHNRL  
LRSRGNVAVDGLPSFRFESIPDGLPETDVDVTQDIPTLCESTMKHCLAPFKELL  
RQINARDDVPPVSCIVSDGCMSTLDAEELGVPEVLFWTT SACGFLAYLYYY  
RFIEKGLSPIKDESYLTKEHLDTKIDWIPSMKNLRLKDIPSFIRTTNPDDIMLNFI  
IREADRAKRASAILNTFDDLEHDVIQSMKSIVPPVYSIGPLH LLEKQESGEYSE  
IGRTGSNLWREETECLDWLNTKARNSVVYVNFSGSITVLSAKQLVEFAWGLAA  
TGKEFLWVIRPDLVAGDEAMVPPEFLTATADRRMLASWCPQEKVLSHPAIGGF  
LTHCGWNSTLES LCGGVPMVCWPFFAEQQTNCKFSRDEWEV GIEIGGDVKRE  
EVEAVVRELMDEEKGNMREKAEWRRLANEATEHKHGS SKLNFEMLVNK  
VLLGE\*

>AT1G50580

MGSKFHAFMYPWFGFGHMIPYLHLANKLAEKGHRVTF FLPKKAHKQLQPLN  
LFPDSIVFEPLTLPVDGLPFGAETASDLPNSTKKPIFVAMDLLRDQIEAKVRAL  
KPDLIFFDFVHWVPEMAEEFGIKSVNYQIISAACVAMVLAPRAELGFPPPDYPL  
SKVALRGHEANVCSL FANSHELFLITKGLKNCDVVSIRTCVELEGKLCGFIEK  
ECQKLLLTGPMLPEPQNKSGKFLEDRWNHWLNGFEPGSVVFCAFGTQFFFE

KDQFQEFCLGMELMGLPFLISVMPPKGSPTVQEALPKGFEERVKKHGIVWEG  
WLEQPLILSHPSVGCFFVNHCFFGSMWESLVSDCQIVFIPQLADQVLITRLLTEE  
LEVSVKVQREDSGWFSKEDLRDTVKSVMMDIDSEIGNLVKRNHKCLKETLVS  
PGLLSGYADKFVEALEIEVNNTKFS\*

>AT5G05870

MEKRNERQVILFPLPLQGCINPMLQLAKILYSRGSITIIHTRFNAPKSSDHPLFT  
FLQIRDGLSESQTQSRDLLLQLTLLNNNCQIPFRECLAKLIKSSDSGTEDRKIS  
CVIDDSGWVFTQSVAESFNLPRFVLCAYKFSFFLGHFLVPQIRREGFLPVPDSE  
ADDLVPEFPPLRKKDLSRIMGTSAQSKPLDAYLLKILDATKPASGIIVMSCKEL  
DHDSLAESENKVFISIFPIGPFHHDVPASSSSLLEPDQSCIPWLDMRETRSVVY  
VSLGSIASLNESDFLEIACGLRNTNQSFLLVVRPGSVHGRDWIESLPSGFMESL  
DGKGGKIVRWAPQLDVL AHRATGGFLTHNGWNSTLESICEGVPMICLPCKWDQ  
FVNARFISEVWRVGIHLEGRIERREIERAVIRLMVESKGEEIRGRIKVL RDEVRR  
SVKQGGSSYRSLDELVDRIISIIIPLVPT\*

>AT1G22380

MGRFVSNEQKPHVVCVPYPAQGHINPMMKVAKLLHVKGHVTFVNTVYNH  
NRLRSRGANALDGLPSFQFESIPDGLPETGVDATQDIPALSESTTKNCLVPFK  
KLLQRIVTREDVPPVSCIVSDGSMSTFLDVAEELGVPEIHFWTTSACGF MAYL  
HFYLFIEKGLCPVKDASCLTKEYLDTVIDWIPSMNNVKLKDIPSFIRTTNPNDI  
MLNFVVREACRTKRASAILNTFDDLEHDIIQSMQSILPPVYPIGPLHLLVNREI  
EEDSEIGRMGSNLWKEETECLGWLNTKSRNSVVYVNFSGSITIMTTAQLLEFAW  
GLAATGKEFLWVMRPDSVAGEEAVIPKEFLAETADRRMLTSWCPQEKVLSHPA  
VGGFLTHCGWNSTLESLSGCVPMVCWPFFAEQQTNCKFSCDEWEV GIEIGGD  
VKRGEVEAVVRELMDGEKGKKMREKAVEWRR LAEKATKLPCGSSVINFETIV  
NKVLLGKIPNT\*

>AT3G22250

MKVTTQPKIIFIPYPAQGHVTPMLHLASAFLSRGFSPVVMTPESIHRRISATNED  
LGITFLALSDGQDRPDAPPSDFFSIENSMENIMPPQLERLLLEEDLDVACVVVD  
LLASWAIGVADRCGVPVAGFWPVMFAAYRLIQAIPELVRTGLVSQKGCPRQLE  
KTIVQPEQPLLSAEDLPWLIGTPKAQKKRKFQWQRTLERTKSLRWILTSSFKDE  
YEDVDNHKASYKKSNDLNKENNGQNPQILHLGPLHNQEATNNITITKTSFWE  
EDMSCLGWLQE QNPNSVIYISFGSWVSPIGESNIQTLALALEASGRPFLWALNR  
VWQEGLPFGFVHRVTITKNQGRIVSWAPQLEVL RND SVGCYVTHCGWNSTM  
EAVASSRLLCYPVAGDQFVNCKYIVDVWKIGVRLSGFGEKEVEDGLRKVME  
DQDMGERLRKLRDRAMGNEARLSSEMNF TFLKNELN\*

>AT1G05560

MAPPHLLVTFPAQGHVNPSLRFARRLIKRTGARVTFVTCVSVFHNSMIANHN  
KVENLSFLTFSDFDGGISTYEDRQKRSVNLKVNGDKALSDFIEATKNGDSP  
VTCLIIYTILLNWAPKVARRFQLPSALLWIQPALVFNIYYTHFMGNKSVFELPNL  
SSLEIRDLP SFLTPSNTNKGAYDAFQEMMEFLIKETKPKILINTFDSLEPEALTA  
FNIDMVAVGPLLPTEIFSGSTNKS VKDQSSSYTLWLDSKTESSVIYVSFGTMVE  
LSKKQIEELARALIEGKRPFLWVITDKSNRET KTEGEEETEIEKIAGFRHELEEV  
GMIVSWCSQIEVLSHRAVGCFTVTHCGWSSTLESVLGVPVVAFFPMWSDQPTN  
AKLLEESWKTGVRVRENKDGLVERGEIRRCLEAVMEEKSVELRENAKKWKR

LAMEAGREGGSSDKNMEAFVEDICGESLIQNLCEAEVVKV\*

>AT1G05530

MAQPHLLVTFPAQGHVNPSLRFARRLIKTTGARVTFATCLSVIHRSMIPNHNN  
VENLSFLTFSDFDGGVISNTDDVQNRLVHFERNKALSDFIEANQNGDSPV  
SCLYITILPNWVPKVARRFHLPSVHLWIQPAFAFDIYNYSTGNNSVFEFPNLPS  
LEIRDLPFLSPTSNTNKAQAVYQELMDFLKEESNPKILVNTFDSLEPEFLTAIP  
NIEMVAVGPLLPAEIFTGSESGKDLSDHQSSTYTLWLDSKTESSVIYVSFGTM  
VELSKKQIEELARALIEGGRPFLWVITDKLNREAKIEGEEETEIEKIAGFRHELE  
EVGMIVSWCSQIEVLRHRAIGCFLTHCGWSSSLESVLGVPVVAFPMWSDQPA  
NAKLLEEIWKTGVRVRENSEGLVERGEIMRCLEAVMEAKSVELRENAEKWK  
RLATEAGREGGSSDKNVEAFVKSFL\*

>AT4G15480

MGSISEMVFETCPSNPPIHVMLVSFQGGGHVNPLLRLGKLIASKGLLVTFVTTE  
LWGKKMRQANKIVDGLKPVGSGSIRFEFFDEEWAEDDDRADFSLYIAHLES  
VGIREVSKLVRRYEEANEPVSLINNPFIWVCHVAEEFNIPCAVLWVQSCACF  
SAYYHYQDGSVSFPTETEPDLVKLPCVPVLKNDEIPSFLHPSRFTGFRQAIL  
GQFKNLSKSFVLDLSDSLEQEVIDYMSSLCVPKTVGPLFKVARTVTSVSDVSGD  
ICKSTDKCLEWLDSPKSSVYISFGTVAYLKQEQIEEIAHGVLKSGLSFLWVI  
RPPPHDLKVETHVLPQELKESSAKGKGMIVDWCPEQVLSHPSVACFVTHCG  
WNSTMESLSSGVPVCCPQWGDQVTDVAVYLIDVFKTGVRLGRGATEERVVP  
REEVAEKLEATVGEKAEELRKNALKWKAEEAAVAPGGSSDKNFREFVEKL  
GAGVTKTKDNGY\*

>AT5G17030

MAKPSQPTRDSHVAVLVFPFGTHAAPLLAVTCRLATAAPSTVFSFFSTARSNSS  
LLSSDIPTNIRVHNVDGVPFGFVLTGNPQHAVELFLEAAPEIFRREIKAAETEVEV  
GRKFKCILTDAFLWLAETAEMKASWVAYYGGGATSLTAHLYTDAIRENV  
GVKEVGERMEETIGFISGMEKIRVKDTQEGVVFGNLDSVFSKTLHQMGLALP  
RATAVFINSEELDPTFTNDRSEFKRYLNIGPLALLSSPSQTSTLVHDPHGCLA  
WIEKRSTASVAYIAFGRVATPPPVELVAIAQGLESSKVPFVWSLQEMKMTHLPE  
GFLDRTREQGMVVPWAPQVELLNHEAMGVFVSHGGWNSVLESVSAGVPMIC  
RPIFGDHAINARSVEAVWEIGVTISSGVFTKDGFEESLDRVLVQDDGKKMKVN  
AKKLEELAQEAVSTKGSSFENFGLLDEVVNFV\*

>AT3G46690

MEKRVEKRRIVLPVAAQGHVTPMMQLGKALQSKGFLITVAQRQFNQIGSSL  
QHFPGFDFVTIPESLPQSESKKLGPAYLMNLNKTSEASFKECISQLSMQQGND  
IACIIYDKLMYFCEAAAKEFKIPSVIFSTSSATIQCVCVLSSELSAEKFLIDMKD  
PEKQDKVLEGLHPLRYKDLPTSGFGPLEPLEMCREVVNKRASAVIINTASCL  
ESLSLSWLQQELGIPVYPLGPLHITASSPGPSLLQEDMSCIEWLNKQKPRSVIYI  
SLGTKAHMETKEMLEMAWGLLNSNQPFLLWVIRPGSVAGFEWIELLPEEVIKM  
VTERGYIAKWAPQIEVLGHPAVGGFVSHCGWNSVLESIVEGVPMICRPLQGEQ  
KLNAMYIESVWKIGIQLEGEVEREGVERAVKRLIIDEEGAAMRERALDLKEKL  
NASVRSYGSSYNALDELVKFLNTE\*

>AT3G55700

MEERKGRRIIMFPLPFGHFNPMIELAGIFHHRGFSVTILHTSYNFPDPSRHPHF

TFRTISHNKEGEEDPLSQSETSSMDLIVLVRRLKQRYAEPFRKSVAAEVGGGET  
VCCLVSDAIWGNTEVVAEEIGVRRVVLRTGGASSFCFAAFPLLRDKGYLPI  
QDSRLDEPVELPPLKVKDLPMETNEPEELYRVVNDMVEGAKSSSGVIWNT  
FEDLERLSLMNCSSKLQVPPFFPIGPFHKYSEDPTPKTENKEDTDWLDKQDPQS  
VYASFGSLAAIEEKEFLEIAWGLRNSERPFLWVVRPGSVRGTEWLESPLGF  
MENIGDKGKIVKWANQLEVLHAIPAIGAFWTHCGWNSTLESICEGVPMICTSC  
FTDQHVNARYIVDVWRVGMILLERSKMEKKEIEKVLRSVMMEKGDGLRERSL  
KLKERADFCLSKDGSSSKYLDKLVSHVLSFDSYAFAS\*

>AT2G30150

MPWPGRGHINPMLNLCKSLVRRDPNLTVTFVVTEE WLGFIGSDPKPNRIHFAT  
LPNIIPSELVRANDFIADAVLTRLEEPFEQLLDRLNSPPTAIIADTYIIWAVRVG  
TKRNIPVASFWTTSATILSLFINSDLLASHGHFPIEPSESKLDEIVDYIPGLSPTRL  
SDLQILHGYSHQVFNIFKKSFGELYKAKYLLFPSAYELEPKAIDFFTSKDFDPVY  
STGPLIPLEELSVGNENRELDYFKWLDEQPESVLYISQGSFLSVSEAQMEEIV  
VGVREAGVKFFWVARGGELKLKEALEGSLGVVVS WC DQLRVLCHAAIGGF  
WTHCGYNSTLEGICSGVPLLTFFPVFDQFLNAKMIVEEWRVGMGIERKKQM  
ELLIVSDEIKELVKRFMDGESEEGKEMRRRTCDLSEICRGAVAKGGSSDANIDA  
FIKDITKIV\*

>AT2G30140

MDPNESPPNQFRHV VAMPYPGRGHINPMMNLCKRLVRRYPNLHVTFVVTEE  
WLGFIGPDPKPDRIHFSTLPNLIPSELVRAKDFIGFIDAVYTRLEEPFEKLLDSL  
SPPPSVIFADTYVIWAVRVGRKRNI PVVSLWTMSATILSFFLHSDLLISHGH  
EPSEEEVVDYVPGLSPTKLRDLPIFDGYS DRVFKTAKLCFDELPGARSLFTT  
AYELEHKAIDAFTSKLDIPVYAIGPLIPFEELSVQNDNKEPNYIQWLEE QPEGSV  
LYISQGSFLSVSEAQMEEIVKGLRESGVRFLWVARGGELKLKEALEGSLGVV  
SWCDQLRVLCHKA VGGFWTHCGFNSTLEGIYSGVPMLAFPLFDQILNAKMI  
VEDWRVGMRIERTKKNELLIGREEIKEVVKRFMDRESEEGKEMRRRACDLSEI  
SRGAVAKSGSSNVNIDEFVRHITNTN\*

>AT2G36790

MAFEKNNEPFPLHFVLPFMAQGHMIPMVDIARLLAQRGV LITIVTTPHNAAR  
FKNVLNRAIESGLPINLVQVKFPYQEAGLQEGQENMDLLTTMEQITSFFKAVN  
LLKEPVQNLIEMSPRPSCLISDMCLSYTSEIAKKFKIPKILFHGMGCFCLLCVN  
VLRKNREILDNLKSDKEYFIVPYFPDRVEFTRPQVPVETYVPAGWKEILED MV  
EADKTSYGVIVNSFQELEPAYAKDFKEARSGKAWTIGPVSLCNKVGVDKAER  
GNKSDIDQDECLWLD SKEPGSVLYVCLGSICNLPLSQLLELGLGLEESQR PFI  
WVIRGWKEYKELVEWFSESGFEDRIQDRGLLIKGWSPQMLILSHPSVGGFLTH  
CGWNSTLEGITAGLPMLTWPLFADQFCNEKLVVQILKVGVS AEVKEVMK WG  
EEEKIGVLVDKEGVKKAVEELMGESDDAKERRRAKELGESAHKAVEEGSS  
HSNITFLLQDIMQLAQSNN\*

>AT1G22370

MADESSLDTKINWIPSMKNLGLKDIPS FIRATNTEDIMLNFFVHEADRAKRAS  
AAILNTFDSLEHDVVRISIQSIIPQVYTIGPLHLFVNRDIDEESDIGQIGTNMWREE  
MECLDWLDTKSPNSVYVNFSGSITVMSAKQLVEFAWGLAATKKDFLWVIRP  
DLVAGDVPMLPPDFLIETANRRMLASWCPQEKVLSHPAVGGFLTHSGWNSTL

ESLSGGVPMVCWPFFAEQQTNCKYCCDEWEVGMIEGGDVRREEVEELVREL  
MDGDKGKKMRQKAEWQRLAEEATKPIYGSSELNFQMVVDKVLLEGE\*

>AT2G26480

MAEIRQRRVLMVPAPFQGHLPSSMMNLASYLSSQGFSITIVRNEFNFKDISHNFP  
GIKFFTIKDGLSESDVKSLGLLEFVLELNSVCEPLLKEFLTNDHDDVVDFFIYDEF  
VYFPRRVAEDMNLPKMVFSPPSAATSISRCVLMENQSNGLLPPQDARSQLEET  
VPEFHPFRFKDLPTAYGSMERLMILYENVSNRASSSGIIHNSSDCLENSFITTA  
QEKWGVVYPVGPLHMTNSAMSCPSLFEEERNCLEWLEKQETSSVIYISMGS  
LAMTQDIEAVEMAMGFVQSNQPFLWVIRPGSINGQESLDFLPEQFNQTVTDG  
RGFVVKWAPQKEVLRHRAVGGFWNHGGWNSCLESISSGVPMICRPYSGDQR  
VNTRLMSHVWQTAYEIEGELERGAVEMAVRRLIVDQEGQEMRM RATILKEEV  
EASVTTEGSSHNSLNNLVHAIMMQIDEQ\*

>AT5G17040

MANSHVAVLAFPPGSHGQAILAVTRRLATAAPSTVFSFLNTSQQSNFSLSSDLPP  
NIRVHDVSDGVPEGYVLSRNPQEAVELFLEAAPEIFRRELAVAETEVRKVTVC  
MLTDAFIWFAGDMAAEMKVSVAFWTSGTRSLLISTQISSEKQSLSKETLGC  
SGMEKIRVKDTPEGVVFVGNLDSVFSKMLHQMGLALPRATTVYMNSFEELDPT  
LTDNLRLLKFKRYSIGPLALLFSTSQRETPLHDPHGCLAWIKKRSTASVVYIAF  
GRVMTPPPGEVVAQGLESSKVPFVWSLQEKNMVHLPKGFLDGTREQGMV  
VPWAPQVELLNHEAMGVFVSHGGWNSVLESVSAGVPMICRPIFGDHALNAR  
SVEAVWEIGMTISSGVFTKDGFEESLDRVLVQDDGKKMKFNKLLKELAQEA  
VSTEGSSFENFKGLLDEVMKV\*

>AT1G30530

MTKFSEPIRDHVAVLAFPPVGAHAGPLLAVTRRLAAASPSTIFSFFNTARSNAS  
LFSSDHPENIKVHDVSDGVPEGTMLGNPLEMVELFLEAAPRIFRSEIAAAEIEV  
GKKVTCMLTDAFFWFAADIAAELNATWVAFWAGGANSLSLAHLYTDLIRETIG  
LKDVSMEEITLGFIPGMENYRVKDIPEEVVFEDLDSVFPKALYQMSLALPRASA  
VFISSFEELEPTLNYNLRSKLRFLNIAPLTLSSSTSEKEMRDPHGCFAWMGKR  
SAASVAYISFGTVMPEPPPEELVAIAQGLESSKVPFVWSLKEKNMVHLPKGFLD  
RTREQGIVVPWAPQVELLKHEAMGVNVTGCGWNSVLESVSAGVPMIGRPILA  
DNRLNGRAVEVVWVGVMMDNGVFTKEGFEKCLNDVHVHDDGKTMKANA  
KKLKEKLQEDFSMKGSSLENFKILLDEIVKV\*

>AT5G05880

MEKSNGLRVILFPLPLQGCINPMIQLAKILHSRGFSITVIHTCFNAPKASSHPLFT  
FIQIQDGLSETETRTRDVKLLITLLNQNCESPVRECLRKLLQSAKEEKQRISCLI  
NDSGWIFTQHLAKSLNLMRLAFNTYKISFFRSHFVLPQLRREMFLPLQDSEQD  
DPVEKFPPLRKKDLLRILEADSVQGDSYSDMILEKTKASSGLIFMSCEELDQDS  
LSQSREDFKVPFAIGPSSHSHFPASSSSLFTPDETCIPWLDQRQEDKSVIYVSI  
VGINETELMEIAWGLSNSDQPFVVRVGSVNGTEWIEAIPYFIKRLNEKGKI  
VKWAPQQEVLKHRAIGGFLTHNGWNSTVESVCEGVPMICLPFRWDQLLNAR  
FVSDVWVGIHLEGRIERDEIERAIRRLLETEGEAIRERIQLLKEKVGRSVKQ  
NGSAYQSLQNLINYISSF\*

>AT2G28080

MADVNRNPTKNHHGHHLHALLIPYFQGHVNPVHVAIKLASQGITVTFVNT

HYIHHQITNGSDGDI FAGVRSESGLDIRYATVSDGLPVGFDRLSNHDTYQSSLL  
HVFYAHVEELVASLVGGDGGVNVMIADTFFVWPSVVARKFGLVCVSWTEA  
ALVFSLYYHMDLLRIHGHFQAQETRSDLIDYIPGVAAINPKDTASYLQETDTSS  
VVHQIIFKAFEDVKKVDFVLCNTIQQFEDKTIKALNTKIPFYAIGPIPFNNQTG  
SVTTSLWSESDCTQWLNTKPKSSVLYISFGSYAHVTKKDLVEIAHGILLSKVN  
VWVVRPDI VSSDETNP LPEGFETEAGDRGIVIPWCCQMTVLSHESVGGFLTHC  
GWNSILETIWCEVPVLCFPLLDQVTNRKLVVDDWEIGINLCEDKSDFGRDEV  
GRNINRLMCGVSKEKIGRVKMSLEGAVRNSGSSSEMNLGLFIDGLLSKVGLSN  
GKA\*

>AT3G21560

MELESSPPLPPHVMLVSFPGQGHVNPLLRLGKLLASKGLLITFVTTESWGKKM  
RISNKIQDRVLKPVGKGYLRYDFFDDGLPEDDEASRTNLTILRPHLELVGKREI  
KNLVKRYKEVTKQPVTCLINNPVSWVCDVAEDLQIPCAVLWVQSCACLAAY  
YYYHHNLVDFPTKTEPEIDVQISGMPLLKHDEIPSFHPSPHSALREVIIDQIKR  
LHKTFSIFIDTFNSLEKDIIDHMSTLSLPGVIRPLGPLYKMAKT VAYDVVKVNIS  
EPTDPCMEWLD SQPVSSVYISFGTVAYLKQE QIDEIAYGVLNADVTFWVIR  
QQELGFNKEKHVLP EEVKGKGKIVEWCSQEKVLSHPSVACFVTHCGWNSTM  
EAVSSGVPTVCFPQWGDQVTD AVY MIDVWKTGVRLSRGEAEERLVPREEVAE  
RLREVTKGEKAIELKKNALKWKEEAEA AVARGGSSDRNLEKFVEKLGAKPV  
GKVQNGSHNHVLAGSIKSF\*

>AT5G05860

MEEKRNGLRVILFPLPLQGCINPMLQLANILHVRGFSITVIHTRFNAPKASSHPL  
FTFLQIPDGLSETEIQDGVMSLLAQINLNAESPFRDCLRKVLESKESERVTCCLI  
DDCGWLFTQSVSESLKLPRLVLC TFKATFFNAYPSLPLIRTKGYLPVSESEAED  
SVPEFPPLQKRDL SKVFGFGEKLD PFLHAVVETTIRSSGLIYMSCEELEKDSL  
LSNEIFKVPVFAIGPFHSYFSASSSSLFTQDETCILWLDDQEDKSVIYVSLGSV  
NITETEFLEIACGLSNSKQPFLWVVRPGSVLGAKWIEPLSEGLVSSLEEKGKIV  
KWAPQQEVLAHRATGGFLTHNGWNSTLESICEGVPMICLPGGWDQMLNSRF  
VSDIWKIGIHLEGRIEKKEIEKAVRVLMEESEGNKIRERMKVLKDEVEKSVKQ  
GGSSFQSIETLANHILL\*

>AT1G22340

MESHVVHNAQKPHVVCVPYPAQGHINPMLKVAKLLYAKGFHVTFVNTLYNH  
NRLRSRGNALDGFPSFRFESIPDGLPETDGDRTQHTPTVCMSIEKNCLAPFK  
EILRRINDKDDVPPVSCIVSDGVMSFTLDA AEELGVPEVIFWTNSACGFMTILH  
FYLFIEKGLSPFKDESYMSKEHLD TVIDWIPSMKNLRLKDIPSYIRTTNPDNIM  
LNFLIREVERSKRASAILNTFDELEHDVIQSMQSILPPVYSIGPLHLLVKEEINE  
ASEIGQMGLNLWREEMECLDWLDTKTPNSVLFVNFGCITVMSAKQLEEFW  
GLAASRKEFLWVIRPNLVVGEAMVVL PQEFLAETIDRRMLASWCPQEKVLSH  
PAIGGFLTHCGWNSTLES LAGGVPMICWPCFSEQPTNCKFCCDEWGVGIEIGK  
DVKREEVETV VRELMDGEKGGKLRKAEWRRLAEEATRYKHGSSVMNLET  
LIHKVFLENLR\*

>AT4G14090

MATSVNGSHRRPHYLLVTFPAQGHINPALQLANRLIHHGATV TYSTAVSAHRR  
MGEPSTKGLSFAWFTDGFDDGLKSFEDQKIYMSSELKRCGSNALRDIKANLD

ATTETEPITGVIYSVLVPWVSTVAREFHLPTLLWIEPATVLDIYYYYFNTSYKH  
LFDVEPIKLPKLPLITTGDLPSFLQPSKALPSALVTLREHIEALETESNPKILVNT  
FSALEHDAELTSVEKLMPIGPLVSSSEGGKTDLFKSSDEDYTKWLDSKLETSVI  
YISLGTTHADDLPEKHMEALTHGVLATNRPFLWVREKNPEEKKKNRFLELIRG  
SDRGLVVGWCSQTAVLAHCAVGCFTVTHCGWNSTLESLESGVPVVAFPQFADQ  
CTTAKLVEDTWRIGVKVKVGEEDVDGEEIRRCLEKVMMSGGEEAEEMRENA  
EKWKAMAVIDAAEGGPSDLNLKGFVDEDE\*

>AT1G24100

MAETTPKVKGHVVILPYPVQGHNLPMVQFAKRLVSKNVKVTIATTTYTASSIT  
TPSLSVEPISDGFDFPIGIPGFSVDTYSEFSLNGSETLTLLEKFKSTDSPIDCLI  
YDSFLPWGLEVARSMELSAASFFTNLTVCSVLRKFSNGDFPLPADPNSAPFRI  
RGLPSLSYDELPSFVGRHWLTHPEHGRVLLNQFPNHENADWLFVNGFEGLEE  
TQDCENGESDAMKATLIGPMIPSAYLDDRMEDEKDYGASLLKPKISKECMEWL  
ETKQAQSVAFVSFGSFGILFEKQLAEVAIALQESDLNFLWVIKEAHIKLPKGF  
VESTKDRALLVSWCNQLEVLAEHESIGCFLTHCGWNSTLEGLSLGVPMVGVVQ  
WSDQMNDKAFVEEVWVKVGYRAKEEAGEVIVKSEELVRCLKGVMEGESSVKI  
RESSKKWKDLAVKAMSEGGSSDRSINEFIESLTK\*

>AT4G15500

MEMESSLPHVMLVSFPGQGHISPLLRLGKIIASKGLIVTFVTTEEPLGKKMRQA  
NNIQDGVLPKPVGLGFLRFEFFEDGFVYKEDFDLLQKSLEVSGKREIKNLVKKY  
EKQPVRLINNAFVPWVCDIAEELQIPSAVLWVQSCACLAAYYYYHHQLVKF  
PTETEPEITVDVPFKPLTLKHDEIPSFLHPSSPLSSIGGTILEQIKRLHKPFSVLIET  
FQELEKDTIDHMSQLCPQVNFNPIGPLFTMAKTIRSDIKGDISKPDSDCIEWLD  
SREPSSVYISFGTLAFLKQNQIDEIAHGILNSGLSCLWVLRPPLEGLAIEPHVL  
PLELEEKGKIVEWCQEQKVLAPAVACFLSHCGWNSTMEALTSVGVVICFPQ  
WGDQVTNAVYVMDVFKTGLRLSRGASDERIVPREEVAERLLEATVGEKAVEL  
RENARRWKEEAESAAYGGTSENFQEFVDKLVVKTMTNINNVV\*

>AT3G46720

MEKNAEKKRIVLVPFPLQGHITPMMQLGQALNLKGFSTVALGDSNRVSSSTQH  
FPGFQFVTIPETIPLSQHEALGVVEFVVTLNKTSETSFKDCIAHLLQHGNDIAC  
IYDELMYFSEATAKDLRIPSVIFTTGSATNHVCSCILSKLNAEKFLIDMKDPEV  
QNMVVENLHPLKYKDLPTSGMGPLERFLEICAEVVNKRTASAVIINTSSCLESS  
SLSWLKQELSIPVYPLGPLHITTSANFSLLEEDRSCIEWLNKQKLRSVIYISVGS  
AHMETKEVLEMAWGLYNSNQPFVWVIRPGTESMPVEVSKIVSERGCIVKWAP  
QNEVLVHPAVGGFWSHCGWNSTLESIVEGVPMICRPFNGEQKLNAMYIESVW  
RVGVLLQGEVERGCVERAVKRLIVDDEGVGMRRERLVLKEKLNASVRSRGGSS  
YNALDELVHYLEAEYRNT\*

>AT4G15490

MDPSRHTHVMLVSFPGQGHVNPLLRLGKLIASKGLLVTFVTTEKPGWKKMR  
QANKIQDGVLPKPVGLGFIRFEFFSDGFADDDEKRFDFDAFRPHLEAVGKQEI  
NLVKRYNKEPVTCLINNAFVPWVCDVAEELHIPSAVLWVQSCACLTAYYYYH  
HRLVKFPTKTEPDISVEIPCLPLKHDEIPSFLHPSSPYTAFGDIILDQLKRFENH  
KSFYLFIDTFRELEKDIMDHMSQLCPQAIISPVGPLFKMAQTLSSDVKGDISEP  
ASDCMEWLDSREPSSVYISFGTIANLKQEQMEEIAHGVLSSGLSVLWVVRPP

MEGTFVEPHVLPRELEEKGKIVEWCPQERVLAHPAIACFLSHCGWNSTMEALT  
AGVPVVCFPQWGDQVTDVYLADVFKTGVRLGRGAAEEMIVSREVVAEKLL  
EATVGEKAVELRENARRWKAEEAAVADGGSSDMNFKEFVDKLVTKHV TRE  
DNGEH\*

>AT3G02100

MDNNSNCRMGRPHVVVIPYPAQGHVLP LISFSRYLAKQGIQITFINTEFNHNRI  
ISSLPNSPHEDYVGDQINLVSIPDGLSDSPEERNIPGKLSSEVLRFMPPKKVEELIE  
RMMAETSGGTIISCVVADQSLGWAIEVA AKFGIRRTAFCPAAAASMLVGFISIQ  
KLIDDGLIDSDGTVRVNKT IQLSPGMPKMETDKFVWVCLKNKESQKNIFQLM  
LQNNNSIESTDWLLCNSVHELETA AFGLGPNIVPIGPIGWAHSLEEGSTSLGSFL  
PHDRDCLDWLDRQIPGSVIYVAFGSGFVMGNPQLEELAIGLELTKRPVLWVTG  
DQQPIKLGSDRVKVVWRWAPQREVLSSGAIGCFVSHCGWNSTLEGAQNGIPFLC  
IPYFADQFINKAYICDVWKIGLGLERDARGV VPRLEVKKKIDEIMRDGGGEYEE  
RAMKVKEIVMKSVAKDGISCENLNK FVNWIKSQVN\*

>AT1G06000

MTTTTTKKPHVLVIPFPQSGHMVPHLDLTHQILLRGATVTVLVTPKNSSYLDA  
LRSLHSPEHFKTLILPFPSHPCIPSGVESLQQLPLEAIVHMF DAL SRLHDPLVDF  
LSRQPPSDLPDAILGSSFLSPWINKVADAFSISISFLPINAHSISVMWAQEDRSF  
FNDLETATTESYGLVINSFYDLEPEFVETVKTRFLNHHRIWTVG PLLPFKAGVD  
RGGQSSIPPAKVS AWLDSCPEDNSV VYVGFSGS QIRLTAEQTAALAAALEKSSV  
RFIWA VRDA AKKVNSSDNSVEEDVIPAGFEERVKEKGLVIRGWAPQTMILEHR  
AVGSYLTHLGWGSVLEGMVGGVMLLAWPMQADHFFNTTLIVDKLRAAVRV  
GENRDSVPDSK LARILAESARED LPERVTLMK LREKAMEAIKEGGSSYKNL  
DELVAEMCL\*

>AT5G37950

MMQLGRAHSLKGF SITVAQTKFNYLNPSKDLADFQFITIPESLPASDLKTLGPI  
WFIKLNKECEISFKKCLGQFLQQQEEIACVIYDEFMYFAEAAA KEFNLPKVI  
FSTENATAFACRSAMCKLYAKDGIAPLTEGCGREEELVPELHPLRYKDLPTS AF  
APVEASVEVFKSSCEKGTASSMIINTVSCLEISSLEWLQELKIPIYPIGPLY MVS  
SAPPTSLLDENESCIDWLNKQK PSSVIYISLGSFTLLETKEVLEMASGLVSSNQ  
YFLWAIRPGSILGSELSNEELFSMMEIPDRGYIVKWATQKQVLAHA AVGAFWS  
HCGWNSTLESIGEGIPVGLLLLLIKR\*

>AT2G23260

MGSSEGQETHVLMVTLPFQGHINPMLKLAKHLSLSSKNLHINLATIESARDLL  
STVEKPRYPVDLVFFSDGLPKEDPKAPETLLKSLNKVGAMNLSKIIEEKRYSCII  
SSPFTPWVPVAASHNISCAILWIQACGAYSVYYRYYMKTNSFPDLEDLNQTV  
ELPALPLLEV RDLP SFMLPSGGAHFYNLMAEFADCLRYVKWVLVNSFYELESE  
IIESMADLKPVIPIGPLVSPFL LGDGEEETLDGKNLDFCKSDDCMEWLDKQA  
RSSVYISFGSMLETLENQVETIAKALKNRGLPFLWVIRPKEKAQNVAVLQEM  
VKEGQGVVLEWSPQEKILSHEAISCFVTHCGWNSTMETV VAGVPVVAYPSWT  
DQPIDARLLVDVFGIGVRMRNDSVDGELKVEEVERCIEAVTEGPAAVDIRRA  
AELKRVARLALAPGGSSTRNLDL FISDITIA\*

>AT5G05890

MEKSNGLRVILFPLPLQGCINPMIQLAKILHSR GFSITVIHTCFNAPKASSHPLFT

FLEIPDGLSETEKRTNNTKLLLTLNLRNCESPFRECLSKLLQSADSETGEEKQRI  
SCLIADSGWMFTQPIAQLKLPILVLSVFTVVSFFRCQFVLPKLRREVYLPLQDS  
EQEDLVQEFPLRKKDIVRILDVETDILDPFLDKVLQMTKASSGLIFMSCEELD  
HDSVSQAREDFKIPIFGIGPSHSHFPATSSSLSTPDETCIPWLDKQEDKSVIYVSY  
GSIVTISESDLIEIAWGLRNSDQPFLLVVRVGSVRGREWIETIPEEIMEKLNEKG  
KIVKWAPQQDVLKHRAIGGFLTHNGWSSTVESVCEAVPMICLPFRWDQMLNA  
RFVSDVWMVGINLEDRVERNEIEGAIRLLVEPEGEAIRERIEHLKEKVGRSFQ  
QNGSAYQSLQNLIDYISSF\*

>AT1G10400

MELEKVHVVLFPYLSKGHMIPMLQLARLLLSHSFAGDISVTVFTTPLNRPFIVD  
SLSGTKATIVDVPFPDNVPEIPPGVECTDKLPALSSSLFVPFTRATKSMQADFER  
ELMSLPRVSFMVSDGFLWWTQESARKLGFPRLVFFGMNCASTVICDSVFQNNQ  
LLSNVKSETEPVSVPEFPWIKVRKCDFVKDMFDPKTTTDPGFKLILDQVTSMN  
QSQGIIFNTFDDLEPVFIDFYKRKRKLLKLVAVGPLCYVNNFLDDEVEEKVKPS  
WMKWLDEKRDKGCNVLYVAFGSQAEISREQLLEEIALGLEESKVNFLWVVKG  
NEIGKGFEEVGERGMMVRDEWVDQRKILEHESVRGFLSHCGWNSLTESICS  
EVPILAFPLAAEQPLNAILVVEELRVAERVVAASEGVVRRREEIAEKVKELMEGE  
KGKELRRNVEAYGKMAKKALEEGIGSSRKNLDNLINEFCNNGT\*

>AT2G23250

MVALAFQGHLPMLKFAKHLARTNLHFTLATTEQARDLLSSTADEPHRPVDL  
AFFSDGLPKDDPRDPDTLAKSLKKGAKNLSKIIIEKRFDCIISVPFTPWPVPAV  
AAAHNIPCAILWIQACGAFSVYYRYMKTNPFPDLEDLNQTVELPALPLLEVR  
DLPSLMLPSQGANVNTLMAEFADCLKDVKWVLVNSFYELESEIIESMSDLKPII  
PIGPLVSPFLGNDDEKTLDMWKVDDYCMEWLDKQARSSVYISFGSILKSLE  
NQVETIATALKNRGVPFLWVIRPKEKGENVQVLQEMVKEGKGVVTEWGQQE  
KILSHMAISCFITHCGWNSTIETVVTGVPVAYPTWIDQPLDARLLVDVFGIGV  
RMKND AIDGELKVAEVERCIEAVTEGPAAADMRRRATELKHAARSAMSPGGS  
SAQNLD SFISDIPIT\*

>AT4G15550

MANNNSNSPTGPHFLFVTFPAQGHINPSLELAKRLAGTISGARVTFAASISAYN  
RRMFSTENVPETLIFATYSDGHDDGFKSSAYS DKSRQDATGNFMSEMRRRGK  
ETLTELIEDNRKQNRPFCTCVVYTILLTWVAELAREFHLP SALLWVQPVTVFSIF  
YHYFNGYEDAISEMANTPSSSIKLP SPLLLTVRDIPSFIVSSNVYAFLLP AFREQI  
DSLKEEINPKILINTFQELEPEAMSSVPDNFKIVPVGPLLTLRTDFSSRGEYIEWL  
DTKADSSVLYVSFGTLAVLSKKQLVELCKALIQSRRPFLWVITDKSYRNKEDE  
QEKEEDCISSFREELDEIGMVVSWCDQFRVLNHR SIGCFVTHCGWNSTLES LV  
SGVPVVAFPQWNDQMMNAKLEDCWKTGVRVMEKKEEEGVVVVDSEEIRR  
CIEEVMEDKAEEFRGNATRWKDLAAEAVREGGSSFNHLKAFVDEHM\*

>AT5G05900

MDKSNGLRVILFPLPLQGCINPMIQLAKILHSRGFSITVIHTRFNAPKASNHPLF  
TFLQIPDGLSETETRTHDITLLLTLNLRNCESPFRECLTKLLQSADSETGEEKQRI  
SCLIDDSGWIFTQPVAQSFNLPRLVLNTYKVSFFRDHFVLPQLRREMYLPLQDS  
EQGDDPVEEFPLRKKDLLQILDQEQSEQLDSYSNMILETTKASSGLIFVSTCEE  
LDQDLSQAREDYQVPIFTIGPSHSYFPGSSSLFTVDETCIPWLDKQEDKSVIY

VSFGSISTIGEAEFMEIAWALRNSDQPFLWVVRGGSVVHGAEWIEQLHEKGKI  
VNWAPQQEVLKHQAIGGFLTHNGWNSTVESVFEGVPMICMPFVWDQLLNAR  
FVSDVWMVGLHLEGRIERNVIEGMIRRLFSETEGKAIRERMEILKENVGRSVK  
PKGSAYRSLQHLIDYITYF\*
